# Supplementary material for: Relationship between vertical and horizontal force-velocity-power profiles in various sports and levels of practice
Source: PeerJ. 2018 Nov 13;6:e5937. doi: 10.7717/peerj.5937 (PMC6238764; doi:10.7717/peerj.5937)
Supplement: Supplemental Information 1 — F0, theoretical maximal force; v0, theoretical maximal velocity; Pmax, theoretical maximal power; LL, low level or amateur; ML, medium level or semi-professional; HL, high level or professional; EL, elite level or international. [file peerj-06-5937-s001.xlsx]

## Sheet: ALL
			HORIZONTAL												VERTICAL
			Vmax theoretical V0 (m/s)	Fmax theoretical F0 (N)	Fmax theoretical F0 (N/kg)	Pmax (W)	Max Horizontal Power Pmax (W/kg)	Velocity profile	Time @ 5 m (s)	Time @ 20 m (s)	Top speed (m/s)	mean RF on 10m	RFpeak	DRF	Fmax theoretical F0 (N/kg)	Vmax theoretical V0 (m/s)	Max Horizontal Power Pmax (W/kg)	SFV (N.s/m/kg)	FV Deficit (%)	Height Sj (m)
		Mass (kg)
BASK_M_2A_1	1.97	79	8.50709	644.016	8.1521	1361.87	17.2389	-75.7034	1.3388	3.3868	8.02581	0.31672	0.51182	-0.0858575	33.7662	3.73089	31.4944	-9.05043	62.779	0.423
BASK_M_2A_2	1.89	82	9.25956	540.623	6.59297	1242.82	15.1564	-58.3854	1.41339	3.46139	8.26662	0.313809	0.470688	-0.0641503	29.9043	4.11758	30.7833	-7.26259	54.351	0.432
BASK_M_2A_3	1.92	82	8.36946	605.369	7.38255	1260.46	15.3714	-72.3307	1.38444	3.37	7.67975	0.292264	0.459406	-0.0803634	25.7479	4.0328	25.959	-6.38462	46.1192	0.331
BASK_M_2A_4	1.9	79	8.7425	547.005	6.92411	1188.08	15.039	-62.5684	1.40479	3.48479	7.99396	0.301274	0.462792	-0.0721005	32.8993	3.49512	28.7468	-9.41291	67.184	0.403
BASK_M_2A_5	2	125	8.63456	610.627	4.88501	1310.2	10.4816	-70.7189	1.64709	3.91909	7.57875	0.252456	0.375531	-0.0533684	28.8579	2.63263	18.993	-10.9616	70.3737	0.24
BASK_M_2A_6	2.03	93	8.63377	650.922	6.99916	1397.35	15.0253	-75.3926	1.4085	3.4885	8.01033	0.290965	0.444236	-0.0748113	29.4107	3.65598	26.8813	-8.04455	60.1977	0.381
BASK_M_2A_7	2.02	104	7.91088	724.824	6.96946	1426.49	13.7162	-91.6237	1.44123	3.64923	7.53255	0.27205	0.441311	-0.0822028	24.9437	4.17335	26.0247	-5.9769	41.5856	0.301
BASK_M_2A_8	1.92	90	9.19517	414.681	4.60756	945.933	10.5104	-45.0977	1.65889	3.93089	7.74637	0.259352	0.378464	-0.04689	33.8571	2.96286	25.0785	-11.4272	80.4911	0.355
BASK_M_2A_9	1.81	72	8.99542	525.936	7.30466	1173.3	16.2958	-58.467	1.3674	3.4154	8.32466	0.335046	0.53048	-0.0715774	38.1943	2.91276	27.8127	-13.1127	88.7651	0.37
BASK_M_2A_10	1.99	95	8.22585	607.015	6.38963	1240.84	13.0614	-73.7936	1.46492	3.67292	7.70652	0.273669	0.428461	-0.0725407	29.6241	2.99984	22.2169	-9.87524	66.6612	0.288
BASK_M_2A_11	2.07	86	8.09251	750.529	8.72708	1510.45	17.5634	-92.7436	1.30817	3.38817	7.80959	0.3101	0.521204	-0.0973446	31.7298	3.11287	24.6927	-10.1931	69.9475	0.339
BASK_M_2A_12	1.81	85	8.40142	579.403	6.8165	1208.5	14.2177	-68.9649	1.42598	3.56998	7.9835	0.290344	0.457773	-0.0752293	33.4631	3.24508	27.1476	-10.3119	67.8337	0.341
BASK_M_2A_13	2.02	74	8.42285	592.914	8.01235	1240.37	16.7617	-70.3935	1.35018	3.39818	7.98765	0.315566	0.51368	-0.0854507	33.7884	3.46917	29.3044	-9.73963	64.9076	0.372
BASK_M_2A_14	2	85	8.37051	630.82	7.42141	1312.37	15.4396	-75.3622	1.3848	3.4968	8.00166	0.292197	0.460621	-0.0822254	34.3469	3.15586	27.0985	-10.8835	73.699	0.36
BASK_M_2A_15	2.03	74	8.99712	513.657	6.9413	1145.89	15.485	-57.0912	1.40595	3.45395	8.34187	0.318137	0.493944	-0.0695575	37.9411	3.23291	30.6651	-11.7359	78.0826	0.412
BASK_M_2A_16	1.89	86	8.15985	651.024	7.57004	1323.46	15.3891	-79.7838	1.3841	3.4961	7.85387	0.270692	0.419409	-0.08772	34.5927	2.91377	25.1988	-11.8722	74.6006	0.321
BASK_M_2B_1	1.82	80	8.95453	472.92	5.9115	1050.1	13.1262	-52.8135	1.50711	3.65111	8.15953	0.292509	0.445889	-0.0607727	30.8098	3.55523	27.384	-8.66606	56.9981	0.34
BASK_M_2B_2	1.82	76	8.68158	504.177	6.63391	1086.54	14.2966	-58.0744	1.43242	3.54442	8.19332	0.290131	0.443771	-0.0711156	31.3157	3.36189	26.32	-9.3149	63.0877	0.347
BASK_M_2B_3	1.88	80	8.18624	608.115	7.60144	1236.95	15.4618	-74.285	1.37352	3.51752	7.89745	0.295019	0.477617	-0.0859311	35.5741	3.27092	29.0901	-10.8759	71.4206	0.38
BASK_M_2B_4	1.8	76	8.66007	502.221	6.60817	1079.88	14.2089	-57.9927	1.45486	3.56686	8.00578	0.293377	0.45388	-0.0701226	31.2693	3.74802	29.2995	-8.34288	52.2059	0.34
BASK_M_2B_5	1.83	78	8.43772	548.116	7.02713	1147.84	14.716	-64.9602	1.39949	3.54349	8.07913	0.298569	0.474075	-0.0769506	34.5774	3.53531	30.5604	-9.78059	62.1044	0.377
BASK_M_2B_6	1.88	68	9.11596	399.756	5.87877	900.972	13.2496	-43.8524	1.50739	3.61939	8.43932	0.307046	0.47613	-0.0588458	29.3313	3.58814	26.3112	-8.17451	54.5867	0.323
BASK_M_2B_7	1.83	64	8.84256	498.75	7.79297	1092.58	17.0715	-56.4033	1.34251	3.35851	8.38267	0.340103	0.547076	-0.077864	39.8599	2.66397	26.5465	-14.9626	99.9092	0.367
BASK_M_2B_8	1.98	72	9.31121	429.587	5.96648	990.474	13.7566	-46.1365	1.49538	3.57538	8.46207	0.305901	0.461662	-0.0585094	36.5772	3.08924	28.249	-11.8402	72.9478	0.35
BASK_M_2B_9	1.95	95	8.20701	543.777	5.72397	1108.04	11.6636	-66.2577	1.54291	3.78291	7.61565	0.265176	0.413955	-0.0654413	34.5165	2.59385	22.3826	-13.3071	84.8772	0.284
BASK_M_2B_10	1.97	71	7.64273	533.67	7.51648	1013.31	14.272	-69.8272	1.41053	3.61853	7.38219	0.278547	0.475484	-0.0911298	28.8749	2.64838	19.1179	-10.9028	81.3218	0.294
BASK_M_2B_11	1.81	98	7.9003	671.07	6.84766	1317.85	13.4475	-84.9423	1.45154	3.65954	7.54379	0.276704	0.453905	-0.0805896	27.8304	2.81486	19.5847	-9.88695	71.7849	0.29
BASK_M_2B_12	1.86	71	8.46109	498.512	7.02129	1046.25	14.7359	-58.9181	1.39949	3.54349	8.07914	0.299209	0.474165	-0.0765897	28.8658	2.67838	19.3284	-10.7774	80.4961	0.293
BASK__F_2B_1	1.73	62	7.54686	391.209	6.30982	735.263	11.8591	-51.8373	1.50824	3.83516	7.10723	0.238194	0.37692	-0.0791473	30.1306	2.93904	22.1387	-10.2519	66.3551	0.279
BASK__F_2B_2	1.78	70	7.61993	477.961	6.82802	907.238	12.9605	-62.7251	1.46892	3.73815	7.18377	0.247537	0.398018	-0.0843397	35.7334	2.37307	21.1995	-15.0579	100.069	0.288
BASK__F_2B_3	1.76	65	7.37078	427.232	6.5728	782.94	12.0452	-57.9629	1.49525	3.8414	7.03586	0.263506	0.455273	-0.0817025	28.1427	3.24154	22.8065	-8.6819	58.6653	0.293
BASK__F_2B_4	1.8	70	8.15255	459.764	6.56806	931.898	13.3128	-56.3952	1.37735	3.50501	7.59895	0.26569	0.41451	-0.0702888	34.6704	2.84809	24.6861	-12.1732	80.1175	0.326
BASK__F_2B_5	1.8	73	8.07239	526.141	7.20741	1056.48	14.4723	-65.1779	1.41245	3.57524	7.67301	0.278316	0.445591	-0.0829073	33.8222	2.80559	23.7228	-12.0553	80.4404	0.319
BASK__F_2B_6	1.7	67	7.08174	416.608	6.21803	733.965	10.9547	-58.8284	1.55397	3.95397	6.76888	0.242377	0.421248	-0.08196	29.1364	3.19351	23.2618	-9.12362	54.4954	0.26
BASK__F_2B_7	1.7	69	7.29276	433.012	6.27553	786.46	11.398	-59.3756	1.53768	3.89768	6.99035	0.234263	0.384593	-0.081507	38.5856	2.23452	21.555	-17.268	104.879	0.267
BASK__F_2B_8	1.85	84	6.19592	511.695	6.09161	789.463	9.39836	-82.5858	1.60167	4.26125	6.02261	0.20886	0.396891	-0.0933705	28.8968	2.28315	16.494	-12.6565	85.1956	0.228
BASK__F_2B_9	1.85	75	6.19561	488.076	6.50768	753.488	10.0465	-78.7777	1.57624	4.2025	6.0449	0.205103	0.390639	-0.100023	23.7512	3.56673	21.1786	-6.6591	44.2517	0.244
BASK__F_2B_10	1.73	65	6.90482	366.008	5.6309	629.621	9.68648	-53.0076	1.61368	4.11368	6.54734	0.20943	0.343071	-0.0783187	26.1117	2.94497	19.2245	-8.86657	60.7823	0.252
BASK__F_2B_11	1.73	59	6.58223	367.274	6.22498	602.106	10.2052	-55.7978	1.56482	4.10482	6.3796	0.213646	0.378232	-0.0900777	24.612	3.18898	19.6218	-7.71783	51.708	0.238
BASK__F_2B_12	1.83	87	6.30357	470.975	5.41351	739.47	8.49966	-74.7157	1.62904	4.25649	6.09365	0.196572	0.351352	-0.082584	26.3634	2.82453	18.6161	-9.33372	62.248	0.237
BASK__F_2B_13	1.83	77	6.09554	466.047	6.05256	708.056	9.19553	-76.4571	1.6177	4.2977	5.9155	0.194657	0.364493	-0.0952899	24.5904	3.58765	22.0555	-6.85418	45.0022	0.249
BASK__F_2B_14	1.77	68	7.65366	401.181	5.89972	764.582	11.2438	-52.4169	1.56263	3.88263	7.11763	0.233642	0.362997	-0.0733003	27.3816	2.99162	20.4788	-9.15277	60.7066	0.253
BASK__F_2B_15	1.78	65	7.75696	359.627	5.53272	692.981	10.6612	-46.3618	1.59099	3.93141	7.12727	0.251423	0.405913	-0.0664909	28.3712	3.17097	22.4911	-8.94718	57.9373	0.27
BASK__F_2B_16	1.8	60	8.06218	473.251	7.88752	948.965	15.8161	-58.7002	1.37956	3.49156	7.66534	0.284232	0.462632	-0.0899641	33.9748	2.74083	23.2798	-12.3958	81.5148	0.302
BASK__F_2B_17	1.7	62	7.30505	391.986	6.27178	712.985	11.4078	-53.6596	1.53768	3.89768	6.99035	0.23471	0.384707	-0.0812734	30.5546	3.02553	23.111	-10.0989	60.3217	0.265
FUTS_M1_A_1	1.85	78.1	8.90302	615.228	7.87744	1361.85	17.4373	-69.1033	1.33157	3.3369	8.29893	0.313315	0.47911	-0.0802926	39.3962	2.73932	26.9797	-14.3817	91.7374	0.345
FUTS_M1_A_2	1.635	53.2	8.96633	431.599	8.11275	961.363	18.0707	-48.1354	1.3322	3.3162	8.32355	0.310559	0.480131	-0.0653389	36.8648	2.97163	27.3871	-12.4056	69.5761	0.303
FUTS_M1_A_3	1.72	68.5	9.4884	558.197	8.14886	1315.36	19.2023	-58.8294	1.30364	3.22364	8.78208	0.341285	0.511901	-0.0762765	38.7085	2.81472	27.2384	-13.7522	89.0931	0.384
FUTS_M1_A_4	1.91	81.8	9.33412	633.016	7.73858	1467.46	17.9397	-67.8174	1.3328	3.29546	8.71201	0.331918	0.501072	-0.0740067	27.4169	4.1207	28.2442	-6.65346	46.2817	0.348
FUTS_M1_A_5	1.775	65.6	9.49261	556.752	8.48707	1311.29	19.9892	-58.6511	1.28417	3.18284	8.98812	0.358361	0.550737	-0.0775642	33.6859	3.11383	26.223	-10.8182	77.2118	0.377
FUTS_M1_A_6	1.74	66.3	9.00125	555.716	8.38184	1241.94	18.7322	-61.7376	1.31693	3.2796	8.51446	0.3399	0.537504	-0.081834	38.9766	3.2736	31.8984	-11.9064	72.8836	0.385
FUTS_M1_A_7	1.82	71.1	8.71269	516.999	7.32293	1119.3	15.8541	-59.3386	1.39447	3.44247	8.19147	0.306819	0.481147	-0.0700991	40.1328	2.50176	25.1007	-16.0418	95.7294	0.308
FUTS_M1_A_8	1.8	73.1	8.71825	567.21	7.75937	1227.91	16.7977	-65.06	1.35339	3.40139	8.27253	0.326013	0.522491	-0.0788192	35.1829	3.39598	29.8701	-10.3602	64.7709	0.36
FUTS_M1_A_9	1.765	79.3	8.41654	604.948	7.71618	1266.68	16.1567	-71.8762	1.37229	3.44163	7.91429	0.31314	0.509099	-0.0808523	31.8441	3.85401	30.6818	-8.26259	52.4549	0.364
FUTS_M1_A_10	1.79	79.9	9.12383	589.502	7.378	1336.94	16.7326	-64.6112	1.37891	3.36291	8.62593	0.310804	0.465954	-0.0735873	33.8932	2.90729	24.6343	-11.658	77.8357	0.33
FUTS_M1_A_11	1.72	67.2	9.32504	587.017	8.73538	1359.88	20.2363	-62.9506	1.27863	3.1773	8.88528	0.330962	0.49189	-0.080328	31.2412	3.73487	29.1705	-8.36472	54.9251	0.362
FUTS_M1_A_12	1.785	83.8	9.2003	632.01	7.54188	1444.19	17.2337	-68.6945	1.35953	3.34353	8.71454	0.331792	0.510896	-0.0727606	36.8613	2.76854	25.513	-13.3144	87.6351	0.343
FUTS_M1_A_13	1.84	76.8	9.23557	587.074	7.64419	1346.86	17.5373	-63.5666	1.35485	3.31752	8.66233	0.326435	0.496446	-0.074115	39.4701	3.29275	32.4913	-11.9869	73.2858	0.398
FUTS_M1_A_14	1.735	68.5	9.22987	550.803	8.04092	1262.58	18.4318	-59.6762	1.32857	3.26991	8.7248	0.314201	0.467372	-0.0719853	42.8333	2.3031	24.6623	-18.5981	111.021	0.302
FUTS_M1_A_15	1.895	80.5	8.64184	610.108	7.57898	1309.07	16.2617	-70.5993	1.36349	3.43282	8.16622	0.328011	0.53307	-0.0770993	32.2264	3.31207	26.6841	-9.72999	64.9669	0.35
FUTS_M1_A_16	1.79	71.6	8.71805	588.845	8.22409	1275.09	17.8086	-67.5432	1.32	3.34667	8.27501	0.328658	0.527681	-0.0835588	38.6515	2.82411	27.2891	-13.6863	87.2775	0.354
FUTS_M1_A_17	1.72	73.9	8.53249	557.095	7.5385	1181.57	15.9887	-65.291	1.38343	3.45276	8.08357	0.303768	0.481051	-0.0801794	32.3912	2.86478	23.1984	-11.3067	73.2684	0.299
FUTS_M2_A_1	1.805	85	8.21761	609.997	7.17644	1246.27	14.662	-74.2305	1.42135	3.55468	7.70913	0.292104	0.472802	-0.0796301	37.4853	2.77295	25.9863	-13.5182	87.6413	0.342
FUTS_M2_A_2	1.835	79.5	9.70489	563.188	7.08412	1357.89	17.0803	-58.0313	1.38831	3.32965	8.79951	0.316561	0.455699	-0.0663448	29.7712	3.99328	29.7212	-7.45532	47.4018	0.338
FUTS_M2_A_3	1.835	83.9	9.00435	605.691	7.21921	1354.66	16.1461	-67.2666	1.39527	3.42193	8.3591	0.31793	0.492276	-0.0718753	31.6556	3.34446	26.4678	-9.46509	62.2849	0.336
FUTS_M2_A_4	1.78	68.1	9.4231	524.579	7.32652	1228.76	17.1615	-55.6695	1.37464	3.34	8.34019	0.318396	0.469574	-0.0696254	35.9145	3.58347	32.1746	-10.0223	62.3958	0.388
FUTS_M2_A_5	1.75	75.1	8.74583	563.886	7.50847	1226.29	16.3287	-64.4749	1.37937	3.40603	8.20412	0.301623	0.464138	-0.0784679	27.1993	4.35839	29.6362	-6.24067	41.5743	0.335
FUTS_M2_A_6	1.746	66.1	9.03831	497.108	7.52055	1116.22	16.8869	-55.0002	1.35969	3.36503	8.38299	0.313456	0.475025	-0.0753893	32.3186	3.58105	28.9336	-9.0249	62.7535	0.389
FUTS_M2_A_7	1.799	74	8.42285	592.914	8.01235	1240.37	16.7617	-70.3935	1.35018	3.39818	7.98765	0.312301	0.510601	-0.0806423	33.7884	3.46917	29.3044	-9.73963	64.9076	0.372
FUTS_M2_A_8	1.81	72.7	9.00248	576.997	7.93668	1290.42	17.7499	-64.093	1.33778	3.32178	8.57119	0.32441	0.501469	-0.0789805	33.7795	3.30498	27.9101	-10.2208	61.8998	0.33
FUTS_M2_A_9	1.87	79.7	8.77063	568.401	7.13176	1238.51	15.5396	-64.8074	1.3931	3.46243	8.18807	0.306166	0.47409	-0.0737051	35.1619	3.46598	30.4676	-10.1449	62.2749	0.363
FUTS_M2_A_10	1.74	68.2	8.30471	543.133	7.96382	1121.02	16.4373	-65.4005	1.35507	3.44574	7.96968	0.307111	0.500867	-0.0864268	32.3571	2.92482	23.6597	-11.0629	73.8146	0.311
FUTS_M2_A_11	1.7	78.8	8.64179	604.304	7.66883	1297.92	16.4711	-69.9281	1.36363	3.41163	8.28954	0.314858	0.500539	-0.07971	29.0529	4.1241	29.9543	-7.04468	48.2791	0.37
FUTS_M2_A_12	1.74	84.6	8.3539	607.475	7.18056	1261.75	14.9143	-72.7176	1.41659	3.52859	7.97536	0.291286	0.462846	-0.0786827	32.1143	3.64322	29.2498	-8.81481	55.1631	0.344
FUTS_M3_A_1	1.76	65.9	8.98948	564.651	8.56829	1261.49	19.1424	-62.8124	1.29885	3.26151	8.52921	0.329497	0.510989	-0.0852517	31.8856	3.32684	26.5196	-9.58436	66.6914	0.362
FUTS_M3_A_2	1.7	61.5	8.92801	503.907	8.19361	1119.1	18.1968	-56.4412	1.32006	3.30406	8.5088	0.310662	0.470482	-0.0837652	34.184	3.01887	25.7993	-11.3234	76.6909	0.35
FUTS_M3_A_3	1.78	72	8.74537	576.091	8.00126	1253.42	17.4087	-65.8738	1.32843	3.35509	8.39596	0.304787	0.466675	-0.0837364	37.128	3.17321	29.4537	-11.7005	69.3862	0.344
FUTS_M3_A_4	1.77	61.5	9.43208	484.52	7.87837	1136.38	18.4778	-51.3693	1.32327	3.26461	8.8803	0.318341	0.463413	-0.0761217	36.0465	3.36259	30.3024	-10.7199	69.2026	0.383
FUTS_M3_A_5	1.86	89.6	9.34544	626.706	6.99448	1458.1	16.2734	-67.06	1.40107	3.38507	8.62587	0.291325	0.410938	-0.0697394	32.9462	3.38713	27.8983	-9.72689	63.9503	0.358
FUTS_M3_A_6	1.83	80.9	9.24488	697.922	8.62697	1603.02	19.8149	-75.4928	1.29175	3.21175	8.71489	0.344667	0.534385	-0.0822321	35.0935	3.24859	28.5011	-10.8027	68.7991	0.358
FUTS_M3_A_7	1.79	71	10.1521	494.794	6.96893	1246.52	17.5566	-48.738	1.38613	3.30613	9.18094	0.325333	0.458434	-0.0618268	35.4224	3.31585	29.3639	-10.6827	71.1882	0.388
FUTS_M3_A_8	1.74	67.4	9.07071	456.697	6.77592	1028.46	15.2591	-50.3485	1.42466	3.47266	8.47336	0.308482	0.467456	-0.0675671	38.6706	3.16548	30.6028	-12.2164	73.6384	0.368
FUTS_M3_A_9	1.75	79.9	9.8713	548.205	6.86113	1342.94	16.8078	-55.5352	1.38961	3.35227	9.15997	0.334801	0.493655	-0.061567	38.0105	3.02809	28.7748	-12.5526	83.6985	0.39
FUTS_M3_A_10	1.78	75.7	8.97536	552.582	7.29963	1231.84	16.2727	-61.5665	1.37414	3.40081	8.50334	0.317442	0.488405	-0.0731086	38.0622	3.18003	30.2597	-11.9692	82.002	0.423
FUTS_M_B_1	1.84	83.3	8.48119	634.393	7.61577	1345.1	16.1477	-74.8	1.36423	3.43356	8.10271	0.306988	0.491303	-0.0818288	36.6107	3.02838	27.7178	-12.0892	79.4931	0.366
FUTS_M_B_2	1.77	73.1	8.96057	527.205	7.21211	1174.45	16.0664	-58.8361	1.39321	3.41988	8.36188	0.310662	0.470482	-0.0837652	34.8997	3.20807	27.9901	-10.8787	69.3245	0.354
FUTS_M_B_3	1.76	76.2	8.77852	537.087	7.04838	1178.71	15.4686	-61.1819	1.39819	3.46752	8.14509	0.301623	0.464138	-0.0784679	30.8263	2.73519	21.0789	-11.2702	71.7457	0.264
FUTS_M_B_4	1.76	75.6	8.63833	532.072	7.038	1149.05	15.1991	-61.5944	1.41795	3.50862	8.11915	0.29457	0.453548	-0.0737693	36.427	2.86342	26.0764	-12.7215	83.7248	0.348
FUTS_M_B_5	1.77	70.4	9.17506	513.04	7.28751	1176.79	16.7158	-55.9169	1.38548	3.39082	8.22995	0.318039	0.475397	-0.0814932	36.0587	3.0368	27.3757	-11.8739	75.7141	0.348
FUTS_M_B_6	1.74	66.6	9.04095	474.799	7.12911	1065.72	16.0018	-52.5165	1.39538	3.42205	8.46011	0.315331	0.48292	-0.0709219	36.2034	3.20861	29.0407	-11.2832	70.6323	0.359
FUTS_M_B_7	1.79	69.2	8.99023	468.5	6.77023	1045.66	15.1106	-52.1121	1.42652	3.49585	8.38081	0.307975	0.471748	-0.0679932	32.7807	3.40317	27.8896	-9.63241	63.3296	0.354
FUTS_M_B_8	1.77	84.6	8.78754	571.286	7.07037	1248.89	15.4566	-65.0108	1.40914	3.46	7.80862	0.295969	0.448526	-0.0730111	34.204	3.03678	25.9675	-11.2633	71.8949	0.329
FUTS_M_B_9	1.76	60	8.6902	472.6	7.00148	1020.55	15.1192	-54.3831	1.42211	3.49144	8.15694	0.29457	0.453548	-0.0737693	30.8554	3.03174	23.3864	-10.1774	67.8884	0.306
FUTS_M_B_10	1.73	59.4	8.82802	414.04	6.97037	907.663	15.2805	-46.9006	1.41602	3.48535	8.29967	0.301355	0.46228	-0.0718312	35.1652	2.73041	24.0038	-12.8791	85.9568	0.323
FUTS_F1_AB_1	1.56	51.8	8.0245	356.088	6.87429	710.029	13.7071	-44.3751	1.44145	3.63879	7.59988	0.276988	0.446425	-0.0789579	29.6706	3.0778	22.83	-9.64019	66.0083	0.304
FUTS_F1_AB_2	1.65	50.2	7.44824	314.888	6.27268	582.936	11.6123	-42.2769	1.52862	3.87529	7.09321	0.247464	0.409604	-0.0789004	29.7143	2.64392	19.6405	-11.2388	74.3301	0.258
FUTS_F1_AB_3	1.68	58.4	7.54246	432.81	7.41112	811.276	13.8917	-57.3831	1.42784	3.66784	7.29275	0.278199	0.483383	-0.089546	28.474	2.92244	20.8034	-9.74322	65.5461	0.272
FUTS_F1_AB_4	1.67	63.1	7.85284	414.085	6.56237	808.492	12.8129	-52.7306	1.48588	3.72588	7.54416	0.26401	0.426155	-0.0777486	31.837	2.6256	20.8978	-12.1256	81.5957	0.283
FUTS_F1_AB_5	1.62	49.2	6.79792	328.623	6.67932	556.017	11.3012	-48.3417	1.51463	3.96797	6.59262	0.227813	0.401256	-0.0929505	28.2643	3.03905	21.4742	-9.30038	60.1314	0.265
FUTS_F1_AB_6	1.55	65	7.22971	405.009	6.23091	728.738	11.2113	-56.0201	1.54344	3.91599	6.93168	0.23302	0.386001	-0.0746826	31.3781	2.81519	22.0838	-11.146	71.068	0.279
FUTS_F1_AB_7	1.61	55.2	7.21855	333.706	6.04539	599.198	10.855	-46.2289	1.55873	3.94807	6.95832	0.234044	0.389397	-0.0791836	32.1865	2.71844	21.8742	-11.8401	73.1376	0.269
FUTS_F1_AB_8	1.79	69.2	7.71197	461.907	6.67496	887.383	12.8235	-59.8948	1.46675	3.72808	7.40903	0.244717	0.383177	-0.0821192	32.8366	2.52156	20.6999	-13.0223	85.2541	0.274
FUTS_F1_AB_9	1.61	62.9	6.82268	379.45	6.0326	645.359	10.2601	-55.6161	1.58413	4.0588	6.59683	0.207291	0.344925	-0.0851923	35.067	2.71668	23.8165	-12.9081	83.6792	0.313
FUTS_F1_AB_10	1.55	57.1	7.44935	395.956	6.93444	733.452	12.845	-53.1532	1.47534	3.75801	7.21095	0.262634	0.449028	-0.0861313	35.3672	2.42673	21.4567	-14.574	88.5079	0.263
FUTS_F1_AB_11	1.64	55.9	8.35564	385.706	6.89993	801.244	14.3335	-46.1611	1.43712	3.57046	7.95446	0.277064	0.428335	-0.076612	34.8993	2.94368	25.6831	-11.8557	76.8706	0.334
FUTS_F1_AB_12	1.6	60	7.21884	427.166	7.11943	766.983	12.783	-59.1738	1.46549	3.79082	7.00592	0.258154	0.454666	-0.0912621	30.4772	2.66895	20.3355	-11.4192	72.5746	0.256
FUTS_F1_AB_13	1.69	63.8	7.85275	418.754	6.56354	817.588	12.8149	-53.3258	1.48579	3.72579	7.54248	0.264037	0.426219	-0.07776	30.4481	2.87166	21.8591	-10.603	73.3803	0.301
FUTS_F1_AB_14	1.63	62.2	7.45884	429.713	6.90857	797.04	12.8141	-57.6112	1.47673	3.75939	7.22272	0.262452	0.447845	-0.0857398	30.2521	3.17872	24.0407	-9.51706	60.7675	0.294
FUTS_F1_AB_15	1.67	60.3	8.3876	411.692	6.82739	858.605	14.2389	-49.0834	1.44206	3.5754	7.97805	0.276343	0.425221	-0.0756018	32.3316	3.23476	26.1462	-9.99506	66.7459	0.342
FUTS_F1_AB_16	1.55	51	7.54665	377.911	7.41001	708.683	13.8957	-50.0766	1.42784	3.66784	7.29275	0.278368	0.483406	-0.089459	34.9856	2.52286	22.0659	-13.8675	84.261	0.272
FUTS_F2_AB_1	1.65	59	7.77364	394.898	6.69319	762.821	12.9292	-50.7997	1.47798	3.71327	7.4072	0.257631	0.422136	-0.0796282	31.5487	2.91836	23.0176	-10.8104	73.0709	0.309
FUTS_F2_AB_2	1.63	53	7.75863	336.593	6.35081	649.698	12.2585	-43.383	1.48799	3.78211	7.38758	0.256172	0.415794	-0.0717961	27.2298	3.13181	21.3197	-8.6946	57.7979	0.268
FUTS_F2_AB_3	1.63	49	7.86335	331.332	6.76188	647.205	13.2083	-42.1363	1.47344	3.68144	7.52928	0.266601	0.439138	-0.0872798	28.6476	3.64428	26.0999	-7.86098	50.9621	0.309
FUTS_F2_AB_4	1.65	60	7.85971	424.207	7.07011	828.124	13.8021	-53.9723	1.43361	3.64161	7.56417	0.277168	0.470344	-0.0899392	32.8873	3.14799	25.8822	-10.4471	68.7593	0.335
FUTS_F2_AB_5	1.73	71	7.24429	449.376	6.32925	810.157	11.4107	-62.0318	1.53438	3.89976	6.95161	0.233123	0.385026	-0.0741841	29.3913	3.10637	22.825	-9.46161	62.1895	0.288
FUTS_F2_AB_6	1.58	50	7.41818	303.926	6.07853	559.503	11.1901	-40.9705	1.54354	3.91154	7.1139	0.250269	0.419236	-0.0774053	34.7547	2.73805	23.79	-12.6932	75.807	0.285
FUTS_F2_AB_7	1.58	52	7.85516	354.308	6.81361	691.17	13.2917	-45.1051	1.45062	3.69062	7.49848	0.271983	0.442346	-0.0810867	32.4605	2.96291	24.0444	-10.9556	69.9529	0.303
FUTS_F2_AB_8	1.8	64	7.97352	418.607	6.54074	828.592	12.9467	-52.4997	1.48587	3.69387	7.63422	0.269645	0.433636	-0.0770365	34.6612	2.51874	21.8257	-13.7613	92.8192	0.299
FUTS_F2_AB_9	1.68	65	7.58912	415.329	6.38967	782.836	12.0436	-54.7269	1.50993	3.81393	7.26273	0.256914	0.42474	-0.0793865	27.9246	2.84006	19.8269	-9.83239	69.9659	0.278
FUTS_F2_AB_10	1.68	56	8.34451	347.964	6.21363	719.902	12.8554	-41.6997	1.48757	3.69345	7.87063	0.268072	0.4159	-0.0652727	33.8295	2.99425	25.3236	-11.2982	75.4483	0.338
FUTS_F2_AB_11	1.6	56.5	7.55977	310.833	5.50147	583.808	10.3329	-41.1168	1.60468	3.97268	7.18508	0.232349	0.366791	-0.0698661	30.4544	3.08399	23.4803	-9.87502	65.8774	0.306
FUTS_F2_AB_12	1.62	60	7.67039	445.599	7.42666	849.292	14.1549	-58.0935	1.41828	3.62628	7.42982	0.277053	0.470324	-0.0900007	34.6262	3.01596	26.1078	-11.481	72.106	0.326
GYM_M_1	1.7	70	9.41309	511.211	7.30302	1193.97	17.0567	-54.3086	1.35434	3.33834	8.55235	0.283297	0.461773	-0.070078	33.3074	3.99823	33.2927	-8.33052	56.8412	0.422
GYM_M_2	1.675	67.5	9.57252	429.525	6.34454	1023.41	15.1169	-44.8707	1.44886	3.48347	7.58834	0.277859	0.445668	-0.0583967	34.1585	3.63249	31.0201	-9.40362	67.8708	0.45
GYM_M_3	1.63	66	9.23925	454.955	6.89326	1042.64	15.7976	-49.2416	1.40852	3.42452	8.41595	0.280669	0.466203	-0.0675594	34.2976	3.44582	29.5458	-9.95339	69.1789	0.405
GYM_M_4	1.685	69	8.97	463.07	6.71	1031.02	14.94	-51.61	1.44	3.51	8.38	0.314435	0.488722	-0.0667973	35.0675	3.51755	30.8379	-9.96928	62.2236	0.37
GYM_M_5	1.61	65	8.79542	458.146	7.0484	1000.73	15.3958	-52.0892	1.41643	3.48576	8.23582	0.304791	0.470725	-0.0721443	38.8374	3.45411	33.5371	-11.2438	63.4746	0.372
GYM_M_6	1.78	73.5	8.41	465.31	6.33	973.9	13.25	-55.32	1.49	3.64	8.01	0.269037	0.408131	-0.0693948	32.1839	3.17998	25.586	-10.1208	71.3143	0.356
GYM_M_7	1.725	63	8.91	485.36	7.7	1074.66	17.06	-54.47	1.36	3.37	8.44	0.323525	0.505175	-0.0757804	40.2	2.95203	29.6678	-13.6177	92.0448	0.406
GYM_M_8	1.75	66	8.81144	494.361	7.49031	1082.54	16.4021	-56.1044	1.36627	3.41427	8.40873	0.317586	0.495527	-0.0750425	35.4874	3.42045	30.3457	-10.3751	73.9812	0.422
GYM_M_9	1.62	69	8.57347	536.345	7.77312	1143.76	16.5762	-62.5587	1.35764	3.40564	8.2213	0.319002	0.51231	-0.078712	35.3772	3.47204	30.7077	-10.1892	63.6109	0.373
GYM_M_10	1.78	77	8.72764	619.114	8.04044	1341.9	17.4273	-70.9372	1.32274	3.33874	8.23563	0.291283	0.528411	-0.0818664	38.1756	3.49263	33.3333	-10.9303	72.419	0.435
GYM_M_11	1.78	62	8.43207	479.277	7.73027	1003.9	16.192	-56.8397	1.37443	3.44377	8.04914	0.313975	0.510663	-0.0808145	34.5844	3.05497	26.4136	-11.3207	79.7967	0.372
GYM_M_12	1.6	64	9.07672	392.657	6.13527	884.15	13.8148	-43.2598	1.48434	3.56434	8.19494	0.337039	0.598176	-0.103436	36.2299	2.86448	25.945	-12.648	78.128	0.323
GYM_M_13	1.64	60	9.0426	400.987	6.68312	900.562	15.0094	-44.3442	1.42414	3.49347	8.44938	0.304156	0.457727	-0.0663534	34.6786	3.0005	26.0133	-11.5576	74.9297	0.342
GYM_M_14	1.68	74	8.42285	592.914	8.01235	1240.37	16.7617	-70.3935	1.35018	3.39818	7.98765	0.269037	0.408131	-0.0693948	33.7884	3.46917	29.3044	-9.73963	64.9076	0.372
GYM_F_1	1.64	56	7.57059	367.867	6.56906	692.327	12.363	-48.5916	1.49592	3.77859	7.10746	0.264248	0.444845	-0.0797588	34.7968	3.08299	26.8196	-11.2867	74.2599	0.352
GYM_F_2	1.67	51.5	7.14705	346.163	6.7216	615.088	11.9435	-48.4344	1.48439	3.87	6.52129	0.256642	0.488031	-0.0862029	36.4582	2.77738	25.3146	-13.1268	87.6601	0.343
GYM_F_3	1.675	55.5	7.49304	382.895	6.89901	712.695	12.8414	-51.1001	1.46095	3.76495	7.06463	0.266393	0.453287	-0.0848397	27.5838	3.61265	24.9127	-7.63535	53.7745	0.324
GYM_F_4	1.634	50.8	7.06	379.84	7.48	666.7	13.12	-53.83	1.45	3.75	6.79	0.25189	0.451355	-0.0972763	35.4501	2.92133	25.8903	-12.1349	77.4617	0.332
GYM_F_5	1.65	52.2	7.92403	374.636	7.17693	738.019	14.1383	-47.2784	1.43652	3.61252	7.51581	0.283838	0.470486	-0.0815276	36.3903	2.80288	25.4994	-12.9832	86.7024	0.345
GYM_F_6	1.67	52.5	7.61043	344.381	6.55963	650.88	12.3977	-45.2511	1.49592	3.79859	7.10745	0.265577	0.445037	-0.0791392	32.8393	3.06185	25.1372	-10.7253	69.548	0.322
GYM_F_7	1.652	50.7	8.07041	334.55	6.59861	670.127	13.2175	-41.4539	1.48188	3.67921	7.47074	0.276463	0.444297	-0.0751555	31.8665	3.26255	25.9915	-9.76736	65.2267	0.339
GYM_F_8	1.61	44	7.51336	299.111	6.79797	558.059	12.6832	-39.8105	1.47569	3.77969	7.16765	0.263734	0.445156	-0.0831719	33.6565	2.86093	24.0723	-11.7642	81.7405	0.338
GYM_F_9	1.675	51.5	7.30798	328.535	6.4167	595.859	11.6379	-44.9557	1.51241	3.89	6.92869	0.266626	0.461657	-0.0778805	34.3731	2.77516	23.8477	-12.386	79.0817	0.306
GYM_F_10	1.685	55	7.08	384.67	6.99	678.18	12.33	-54.3	1.49	3.85	6.8	0.241668	0.41874	-0.0922994	32.9097	3.06656	25.2299	-10.7318	69.5896	0.322
GYM_F_11	1.754	54.2	7.99	367.76	6.79	729.72	13.46	-46.03	1.45	3.68	7.51	0.281697	0.460118	-0.0767354	33.7076	3.09079	26.0458	-10.9058	71.7756	0.34
GYM_F_12	1.73	60.7	6.99265	417.199	6.96493	725.023	12.1039	-59.6626	1.47149	3.86	6.73003	0.264132	0.482863	-0.0876031	31.5202	3.14255	24.7634	-10.0301	65.04	0.313
HAND_M1_A_1	1.91	95	9.26718	639.467	6.73123	1472.16	15.4964	-69.0034	1.42589	3.45256	8.5545	0.311603	0.467443	-0.0656696	34.2572	3.85276	32.9962	-8.89162	52.3242	0.355
HAND_M1_A_2	1.86	93.3	8.25828	677.035	7.25654	1391.65	14.9159	-81.9825	1.40497	3.5383	7.89781	0.280984	0.440552	-0.0814573	27.5106	3.96415	27.2641	-6.93985	45.6482	0.32
HAND_M1_A_3	1.86	99	8.96203	793.592	8.01608	1768.99	17.8686	-88.5504	1.32671	3.31071	8.56558	0.320375	0.492775	-0.0807519	28.7375	6.0746	43.6421	-4.73076	27.0437	0.363
HAND_M1_A_4	1.875	95	8.45992	675.536	7.1109	1421.07	14.9586	-79.8514	1.4049	3.5169	7.98181	0.295825	0.46564	-0.0767844	31.4143	3.73306	29.3178	-8.41515	55.2468	0.362
HAND_M1_A_5	1.89	91.8	8.14488	646.535	7.04287	1309.69	14.2667	-79.3794	1.4354	3.59007	7.65224	0.282797	0.455893	-0.0795077	34.6934	3.7211	32.2744	-9.32343	51.6958	0.332
HAND_M1_A_6	1.99	97.8	8.82658	738.819	7.55439	1621.87	16.5835	-83.704	1.37575	3.40241	8.3289	0.305492	0.467937	-0.0781009	33.0929	3.401	28.1372	-9.73034	67.6878	0.388
HAND_M1_A_7	1.82	85	8.44574	589.89	6.93988	1237.82	14.5626	-69.8446	1.42022	3.55356	7.96076	0.303128	0.48712	-0.074066	28.1209	4.15588	29.2168	-6.76654	43.0536	0.319
HAND_M1_A_8	1.9	89	8.6425	669.43	7.52168	1439.19	16.1706	-77.4579	1.36791	3.43724	8.24324	0.297976	0.459751	-0.0798221	31.8736	3.71888	29.6335	-8.57077	56.2469	0.367
HAND_M1_A_9	1.83	71.3	9.48703	504.203	7.07157	1188.03	16.6625	-53.1466	1.39458	3.37858	8.69516	0.313034	0.456483	-0.067769	31.6314	4.07009	32.1857	-7.77167	48.7966	0.37
HAND_M1_A_10	1.84	78	9.06452	633.332	8.11964	1426.15	18.284	-69.8693	1.3177	3.28036	8.5586	0.332137	0.51484	-0.0797073	28.8159	6.94053	49.9993	-4.15182	25.5857	0.432
HAND_M1_A_11	1.835	87.2	9.09937	614.234	7.04397	1389.43	15.9338	-67.5029	1.40643	3.43309	8.52902	0.303256	0.452985	-0.0707943	33.3614	4.41856	36.8523	-7.55029	48.1236	0.422
HAND_M1_A_12	1.9	93.9	8.74536	556.038	5.92159	1208.78	12.8731	-63.5809	1.5047	3.65937	8.09947	0.274491	0.409455	-0.0628977	26.0053	5.67824	36.9161	-4.57982	28.7027	0.34
HAND_M1_A_13	2.03	120.3	8.60498	1033.91	8.59443	2212.38	18.3905	-120.153	1.29471	3.30004	8.21953	0.334114	0.547451	-0.087904	31.0082	3.24497	25.1552	-9.55577	71.3792	0.37
HAND_M1_A_14	1.76	76.8	8.60601	536.285	6.98288	1146.75	14.9317	-62.3152	1.42279	3.51346	8.10703	0.299794	0.470476	-0.0737192	34.8099	3.81153	33.1698	-9.1328	50.5172	0.333
HAND_M1_A_15	1.74	70.7	9.04445	547.301	7.74118	1229.16	17.3855	-60.5124	1.35199	3.33599	8.53604	0.32916	0.511908	-0.0760732	35.0567	2.94077	25.7735	-11.9209	79.6094	0.346
HAND_M2_A_1	1.9	90.8	8.35518	771.386	8.49544	1602.44	17.648	-92.3243	1.32369	3.37169	7.94506	0.318946	0.529672	-0.0904998	39.6113	2.66441	26.3852	-14.8668	94.8737	0.339
HAND_M2_A_2	1.8	83.3	8.14771	579.83	6.96075	1174.44	14.0989	-71.1648	1.43516	3.58983	7.83209	0.28766	0.466482	-0.0780697	28.5839	3.86302	27.605	-7.39937	55.391	0.398
HAND_M2_A_3	1.92	85.1	8.66592	513.743	6.03693	1107.21	13.0108	-59.2831	1.49629	3.65095	7.87933	0.265621	0.38991	-0.0653441	32.31	3.08655	24.9316	-10.468	68.8984	0.323
HAND_M2_A_4	1.87	83.8	7.77431	563.555	6.725	1089.12	12.9967	-72.4893	1.47151	3.71151	7.36498	0.275959	0.46132	-0.0793268	29.0401	2.72482	19.7822	-10.6576	79.0491	0.301
HAND_M2_A_5	1.94	95.8	8.29703	657.594	6.86424	1358.05	14.1759	-79.2566	1.43906	3.57239	7.84499	0.27215	0.419601	-0.0772205	32.7919	3.52735	28.9171	-9.29646	66.3482	0.406
HAND_M2_A_6	1.8	82	9.02886	593.967	7.2435	1332.59	16.2512	-65.7854	1.39305	3.39838	8.37367	0.311346	0.474989	-0.0726359	36.2988	3.09895	28.122	-11.7133	74.6315	0.364
HAND_M2_A_7	1.88	70.5	8.07016	627.307	8.89797	1258.82	17.8556	-77.7317	1.29664	3.3873	7.77809	0.308176	0.521158	-0.0989152	29.1968	3.53504	25.803	-8.25925	60.3617	0.372
HAND_M2_A_8	1.91	88.8	8.58623	712.204	8.02031	1520.62	17.1241	-82.9472	1.34821	3.37488	8.15963	0.311375	0.494266	-0.0844249	32.8255	2.83601	23.2734	-11.5745	91.436	0.371
HAND_M2_A_9	1.89	102	7.79869	704.138	6.90331	1366.3	13.3951	-90.2892	1.45959	3.67825	7.45698	0.272202	0.451708	-0.0817267	34.9575	2.11722	18.5032	-16.5111	117.864	0.266
HAND_M2_A_10	1.79	78	8.74827	582.995	7.47429	1267.72	16.2529	-66.6412	1.38316	3.40982	8.29188	0.306054	0.475355	-0.0776143	39.6024	2.50992	24.8498	-15.7783	115.194	0.374
HAND_M2_A_11	1.94	95.8	7.73056	614.784	7.4429	1182.2	14.3124	-79.5263	1.40985	3.62851	7.41694	0.275884	0.463417	-0.0886094	29.1647	2.92838	21.3513	-9.95932	78.7591	0.348
HAND_M2_A_12	1.84	86.1	8.85579	596.177	6.92424	1312.41	15.2429	-67.3206	1.40684	3.47617	8.31635	0.298212	0.451475	-0.0716154	31.5642	4.13779	32.6515	-7.62828	49.0503	0.389
HAND_M2_A_13	1.96	130	7.34283	844.119	6.49322	1543.52	11.8732	-114.958	1.50354	3.82887	7.05272	0.249801	0.423096	-0.0828267	23.3647	3.80143	22.2049	-6.1463	47.015	0.298
HAND_M2_A_14	1.91	94.2	9.11691	608.208	6.45656	1377.56	14.6238	-66.7121	1.4473	3.51663	8.41983	0.302465	0.454698	-0.0643983	38.3814	2.73247	26.219	-14.0464	88.2112	0.333
HAND_M2_A_15	2	90	8.26796	645.966	7.1774	1328.35	14.7594	-78.1288	1.41074	3.54407	7.86211	0.284243	0.449871	-0.0800166	22.9184	4.62847	26.5193	-4.95163	37.0433	0.317
HAND_M2_A_16	1.87	93.5	8.36798	609.662	6.52045	1268.47	13.5665	-72.8566	1.45918	3.61384	7.9574	0.281022	0.439666	-0.0718566	31.3132	2.39501	18.7488	-13.0743	94.4522	0.278
HAND_F_A_1	1.65	60	7.91101	430.515	7.17524	846.35	14.1058	-54.4197	1.43652	3.61252	7.51582	0.283003	0.470357	-0.0828797	32.4339	2.91554	23.6405	-11.1245	72.1099	0.304
HAND_F_A_2	1.7	62	7.92515	444.642	7.17165	875.388	14.1192	-56.1052	1.43652	3.61252	7.51581	0.283498	0.470432	-0.0826231	31.6108	2.77037	21.8934	-11.4103	75.9442	0.295
HAND_F_A_3	1.7	65	7.5575	404.905	6.22931	760.186	11.6952	-53.5766	1.52358	3.83608	7.13045	0.266315	0.452188	-0.0756128	32.992	2.87636	23.7242	-11.4701	75.4549	0.314
HAND_F_A_4	1.74	68	7.93739	445.924	6.55771	879.778	12.9379	-56.1802	1.48473	3.70339	7.42379	0.271127	0.44012	-0.0763397	34.5318	2.65013	22.8784	-13.0302	86.8656	0.31
HAND_F_A_5	1.56	59	7.93672	426.887	7.23537	841.687	14.2659	-53.7863	1.42791	3.60391	7.51058	0.286075	0.475712	-0.0830521	33.6331	3.26169	27.4252	-10.3116	62.4926	0.326
HAND_F_A_6	1.75	68	7.52783	432.561	6.36119	809.343	11.9021	-57.4615	1.52097	3.82497	7.07926	0.26146	0.441582	-0.0781416	27.0544	3.34366	22.6152	-8.09124	53.9199	0.281
HAND_F_A_7	1.8	78	7.17013	492.609	6.3155	883.017	11.3207	-68.7029	1.535	3.942	6.93306	0.253563	0.433533	-0.0797202	25.3981	3.88333	24.6572	-6.54029	44.8799	0.292
HAND_F_A_8	1.72	74	7.26166	488.112	6.5961	886.125	11.9747	-67.2176	1.509	3.871	7.02543	0.251672	0.432523	-0.0794242	28.6175	3.41884	24.4597	-8.37054	54.2761	0.297
HAND_F_A_9	1.73	71	7.05232	519.947	7.3232	916.707	12.9114	-73.7271	1.432	3.852	6.84518	0.262266	0.443632	-0.0744189	31.2252	3.12462	24.3917	-9.99328	63.8117	0.302
HAND_F_A_10	1.7	66	7.56002	433.608	6.56982	814.888	12.3468	-57.3554	1.49592	3.77859	7.11646	0.263753	0.444777	-0.0803368	32.4056	3.33297	27.0017	-9.72274	61.0173	0.327
HAND_F_A_11	1.73	76	7.5184	483.607	6.36325	903.936	11.8939	-64.3231	1.52097	3.82497	7.07927	0.261153	0.441543	-0.0783048	33.7832	2.91271	24.6001	-11.5986	75.209	0.32
HAND_F_A_12	1.73	66	7.56954	433.458	6.56755	815.438	12.3551	-57.2634	1.49592	3.77859	7.11201	0.264076	0.444822	-0.0801661	37.549	2.67728	25.1323	-14.0251	89.5518	0.337
HAND_F_A_13	1.75	74	7.43285	504.486	6.81738	932.786	12.6052	-67.8725	1.47569	3.77969	7.16765	0.26062	0.444644	-0.0850565	33.5202	2.49658	20.9215	-13.4264	87.9493	0.28
HAND_F_A_14	1.75	75	7.17198	468.271	6.24361	839.607	11.1948	-65.2917	1.531	3.964	6.93239	0.236421	0.36776	-0.0756987	28.7021	3.50693	25.1641	-8.18439	52.2579	0.294
HAND_F_A_15	1.79	77	7.1016	506.948	6.58373	900.035	11.6888	-71.3849	1.502	3.918	6.87658	0.30211	0.481792	-0.0824552	28.0662	3.03544	21.2983	-9.2462	62.2873	0.279
JUD_M_A_1	1.71	70	7.90814	453.999	6.4857	891.437	12.7348	-57.4091	1.47043	3.71402	7.41987	0.28078	0.46404	-0.0754257	32.967	3.12437	25.7503	-10.5516	69.4485	0.337
JUD_M_A_2	1.77	74	8.35473	442.752	5.98314	918.498	12.4121	-52.9942	1.50708	3.71508	7.63551	0.274632	0.427813	-0.0664571	30.0659	3.64331	27.3849	-8.25234	53.4564	0.331
JUD_M_A_3	1.79	78.8	8.19417	464.566	5.89551	945.985	12.0049	-56.6947	1.51849	3.75849	7.53506	0.261909	0.403538	-0.0675618	30.8448	3.14508	24.2523	-9.80731	66.3793	0.323
JUD_M_A_4	1.7	70	8.02478	390.353	5.57647	777.45	11.1064	-48.6435	1.55858	3.86258	7.37779	0.262171	0.416922	-0.0649711	29.1982	3.64839	26.6317	-8.00304	50.2421	0.306
JUD_M_A_5	1.71	64	8.208	376.646	5.88509	767.689	11.9951	-45.8876	1.51821	3.74624	7.43648	0.268554	0.419138	-0.0666244	32.6721	3.28624	26.842	-9.9421	60.2989	0.314
JUD_M_A_6	1.73	73.8	8.00443	457.132	6.1942	911.778	12.3547	-57.1099	1.50581	3.74581	7.43102	0.240323	0.35847	-0.0739586	30.1247	3.24943	24.472	-9.27078	60.1136	0.306
JUD_M_A_7	1.74	77.6	8.44817	456.863	5.88741	958.731	12.3548	-54.0783	1.51249	3.72049	7.63347	0.274382	0.42325	-0.0646191	30.1135	3.45322	25.9971	-8.72041	58.2351	0.328
JUD_M_A_8	1.78	79.9	8.1601	472.132	5.90904	957.26	11.9807	-57.8586	1.51715	3.75715	7.43859	0.267852	0.419882	-0.0673917	27.9128	3.26278	22.7684	-8.5549	57.0223	0.287
JUD_M_A_9	1.63	58	7.60767	391.386	6.74804	740.075	12.7599	-51.4463	1.47034	3.703	7.23283	0.266333	0.446662	-0.0819523	35.4058	3.14056	27.7986	-11.2737	69.5006	0.338
JUD_M_A_10	1.73	77	8.37138	411.332	5.34197	855.552	11.1111	-49.1355	1.59368	3.83442	7.30984	0.263689	0.407531	-0.0592129	31.514	2.9392	23.1565	-10.722	72.487	0.308
JUD_F_AB_1	1.59	49	6.18285	326.501	6.66329	503.052	10.2664	-52.8076	1.56519	4.18919	6.00805	0.199756	0.375996	-0.103106	35.7244	2.09455	18.7067	-17.0558	109.369	0.241
JUD_F_AB_2	1.59	56	6.90782	211.256	4.31135	363.654	7.4215	-30.5822	1.79025	4.43558	6.32604	0.174867	0.259235	-0.0614701	31.2097	2.35091	18.3428	-13.2756	86.1531	0.236
JUD_F_AB_3	1.7	58	7.16468	299.768	5.16841	535.296	9.22923	-41.8397	1.66336	4.13802	6.62688	0.198949	0.302149	-0.069933	31.482	2.42072	19.0523	-13.0052	84.6719	0.249
JUD_F_AB_4	1.7	63	6.90153	467.3	8.0569	803.078	13.8462	-67.7096	1.41351	3.78151	6.7046	0.24557	0.452726	-0.108968	33.3758	2.5529	21.3013	-13.0736	88.0717	0.288
JUD_F_AB_5	1.62	55	6.39823	342.182	6.2215	545.131	9.91147	-53.4808	1.58841	4.16974	6.21093	0.209711	0.382981	-0.0925784	31.8687	2.30845	18.3918	-13.8052	87.162	0.234
JUD_F_AB_6	1.68	62	6.85588	424.115	6.95271	724.035	11.8694	-61.8615	1.49672	3.90739	6.63968	0.233892	0.416265	-0.0951609	31.498	2.76611	21.7817	-11.3871	69.175	0.26
JUD_F_AB_7	1.67	60	7.06402	419.951	6.99919	738.481	12.308	-59.4493	1.48578	3.85378	6.79557	0.24062	0.418498	-0.0931588	30.6464	2.96534	22.7192	-10.3349	64.9214	0.278
JUD_F_AB_8	1.67	58	6.27369	374.458	6.80833	585.416	10.6439	-59.6871	1.53751	4.14018	6.09755	0.204976	0.384011	-0.103724	31.2313	2.37197	18.52	-13.1668	86.6558	0.248
JUD_F_AB_9	1.69	69	6.56432	446.231	6.66017	729.474	10.8877	-67.9783	1.53192	4.04925	6.36682	0.221191	0.404149	-0.0961723	28.0927	2.62942	18.4669	-10.684	69.3768	0.233
JUD_F_AB_10	1.72	60	7.31605	227.528	4.13687	414.934	7.54426	-31.0998	1.80006	4.40272	6.52687	0.175456	0.244879	-0.0557204	27.118	2.97975	20.2013	-9.10076	58.6667	0.247
KAR_M_B_1	1.72	61	8.05495	485.593	7.96054	973.047	15.9516	-60.285	1.35506	3.48839	7.70058	0.286994	0.465543	-0.0908338	36.7746	3.11914	28.6763	-11.79	79.7635	0.396
KAR_M_B_2	1.67	55	8.0477	378.54	6.88255	757.705	13.7764	-47.0371	1.45276	3.62876	7.61554	0.266015	0.417888	-0.0798526	41.5217	2.73877	28.4296	-15.1607	99.6276	0.381
KAR_M_B_3	1.69	62	8.59475	301.566	5.48301	644.374	11.7159	-35.0872	1.55675	3.79675	7.77142	0.246918	0.352476	-0.0604969	35.5993	3.02088	26.8853	-11.7844	80.9121	0.377
KAR_M_B_4	1.7	58	8.14177	354.516	6.11235	719.015	12.3968	-43.5429	1.50455	3.74455	7.52149	0.240641	0.351735	-0.0716705	36.694	2.78278	25.5278	-13.1861	85.5	0.332
KAR_M_B_5	1.72	64	7.34428	421.524	7.26766	770.462	13.2838	-57.3949	1.44744	3.75144	7.04226	0.252321	0.430274	-0.0925163	30.3334	3.22716	24.4727	-9.3994	62.7511	0.316
KAR_M_B_6	1.75	71.2	9.06284	514.648	7.2282	1165.9	16.375	-56.7866	1.37525	3.40192	8.43847	0.260746	0.347007	-0.0763942	37.0106	3.57524	33.0805	-10.3519	68.617	0.438
KAR_M_B_7	1.78	60	8.28808	353.54	5.89234	729.862	12.1644	-42.6565	1.53819	3.75685	7.57673	0.238199	0.341429	-0.0679912	32.5723	3.44427	28.047	-9.45698	63.0963	0.364
KAR_M_B_8	1.79	63.3	8.86271	334.448	5.57413	736.238	12.2706	-37.7365	1.55762	3.73362	7.85255	0.260621	0.376356	-0.0589856	31.1077	3.43669	26.7269	-9.05163	61.3007	0.348
KAR_M_B_9	1.7	70.7	8.91572	382.242	5.62121	846.816	12.4532	-42.8729	1.55166	3.70632	7.94442	0.265359	0.384465	-0.0589836	31.7225	3.24541	25.7382	-9.77459	65.2759	0.333
KAR_M_B_10	1.83	66.5	8.56543	447.527	6.72972	953.174	14.3334	-52.248	1.43243	3.56576	7.87686	0.277131	0.41596	-0.0731454	41.5973	2.80694	29.1903	-14.8194	101.632	0.406
KAR_M_B_11	1.8	66.5	7.7561	618.938	9.30735	1195.32	17.9748	-79.8002	1.29814	3.43148	7.48981	0.287598	0.495279	-0.10958	40.8954	2.68415	27.4424	-15.2359	104.596	0.384
KAR_M_B_12	1.72	70	8.09463	440.22	6.28885	887.423	12.6775	-54.3842	1.48899	3.70766	7.5378	0.255669	0.390901	-0.072102	39.9273	2.62385	26.1908	-15.217	101.617	0.356
KAR_M_B_13	1.74	54.6	7.63481	309.593	6.74495	587.495	12.7995	-40.5502	1.47037	3.75303	7.23602	0.267591	0.446834	-0.0806063	33.3487	3.0897	25.7594	-10.7935	67.8038	0.317
KAR_M_B_14	1.65	53.6	8.49626	418.404	7.80605	884.803	16.5075	-49.2457	1.36723	3.43656	7.99978	0.288775	0.444132	-0.0838895	37.7377	3.72131	35.1085	-10.141	58.1961	0.384
KAR_M_B_15	1.72	54	8.29796	364.505	6.7501	752.921	13.943	-43.9271	1.44466	3.59933	7.77194	0.268855	0.408559	-0.0747612	36.9386	3.32336	30.69	-11.1148	69.392	0.38
KAR_M_B_16	1.72	56	7.94268	410.048	7.32228	810.976	14.4817	-51.6259	1.41111	3.58711	7.55868	0.265922	0.420718	-0.0852284	35.3739	3.18126	28.1334	-11.1195	70.8473	0.356
KAR_M_B_17	1.68	67.5	8.00852	592.409	8.77643	1180.87	17.4944	-73.9723	1.30928	3.42128	7.71283	0.30268	0.511563	-0.0968787	31.3629	3.13254	24.5614	-10.012	64.9207	0.306
KAR_M_B_18	1.73	60.3	8.16892	366.088	6.07112	745.165	12.3576	-44.8148	1.50936	3.74936	7.5111	0.240634	0.350084	-0.0700692	34.0517	3.14212	26.7486	-10.8372	74.4098	0.364
KAR_F_B_1	1.51	58.4	6.59084	347.378	5.94825	570.865	9.77509	-52.7061	1.60711	4.14578	6.3364	0.198927	0.33703	-0.0872434	30.7078	3.27202	25.1191	-9.38497	51.7288	0.251
KAR_F_B_2	1.53	60.8	6.37185	421.59	6.93404	668.817	11.0003	-66.1645	1.52304	4.08304	6.22238	0.225336	0.434765	-0.102094	31.5499	2.83773	22.3825	-11.118	67.5674	0.268
KAR_F_B_3	1.5	54	7.15403	348.308	6.45014	621.751	11.5139	-48.6869	1.51513	3.90447	6.84121	0.214219	0.340193	-0.0869967	32.2437	2.66744	21.502	-12.0879	74.6375	0.265
KAR_F_B_4	1.56	58	7.28657	418.851	7.22157	760.512	13.1123	-57.4826	1.45341	3.75741	7.00117	0.240782	0.40397	-0.0937475	28.7505	3.02232	21.7233	-9.51274	58.7521	0.254
KAR_F_B_5	1.61	56.7	6.80398	414.584	7.31189	701.983	12.3807	-60.9326	1.45957	3.89157	6.60508	0.242876	0.446904	-0.100135	33.171	2.75697	22.8628	-12.0317	75.5878	0.287
KAR_F_B_6	1.63	64	7.11921	391.284	6.11381	692.894	10.8265	-54.9617	1.55995	3.97062	6.77747	0.238248	0.408102	-0.0807125	28.6206	2.92944	20.9606	-9.77	63.1017	0.259
KAR_F_B_7	1.62	48.5	7.16252	347.026	7.15518	618.913	12.7611	-48.4503	1.45277	3.79944	6.88925	0.239551	0.406855	-0.0942934	34.0134	2.7523	23.4037	-12.3582	78.8893	0.3
KAR_F_B_8	1.65	53.8	7.09917	409.431	7.61025	724.051	13.4582	-57.6731	1.41993	3.7666	6.87888	0.241688	0.419878	-0.100934	30.7782	2.73026	21.0081	-11.273	73.8588	0.271
KAR_F_B_9	1.66	55.3	7.30293	387.068	6.99943	703.655	12.7243	-53.0018	1.45728	3.78261	7.04621	0.245154	0.411697	-0.0902022	29.3082	3.46896	25.4173	-8.44871	52.2085	0.289
KAR_F_B_10	1.69	67	6.44104	467.228	6.97355	749.018	11.1794	-72.5392	1.52441	4.04174	6.28659	0.230251	0.445149	-0.101082	31.588	2.55939	20.2115	-12.342	79.5631	0.261
KAR_F_B_11	1.67	71.1	6.5581	473.69	6.66231	773.755	10.8826	-72.2298	1.53192	4.04925	6.36682	0.221009	0.40411	-0.0962672	31.3299	2.1279	16.6667	-14.7234	96.9667	0.222
KAR_F_B_12	1.55	52.7	7.51982	390.712	7.41389	730.893	13.8689	-51.9576	1.42819	3.66819	7.24481	0.271713	0.467411	-0.0896498	33.9169	3.04944	25.8568	-11.1223	67.5287	0.307
KAR_F_B_13	1.62	58	6.55203	398.52	6.87104	648.829	11.1867	-60.8239	1.51628	4.01228	6.40003	0.251872	0.492142	-0.0962005	31.3369	3.12583	24.4885	-10.0251	57.6325	0.266
KAR_F_B_14	1.63	62	6.671	379.496	6.1209	628.779	10.1416	-56.8874	1.57149	4.09949	6.49404	0.251024	0.473388	-0.0846187	28.5081	3.11609	22.2084	-9.14869	56.5296	0.255
RUG_M_A_1	1.93	118.5	8.85461	1037.23	8.85009	2296.07	19.591	-117.139	1.24	3.24	8.64116	0.302478	0.555	-0.0823741	27.7537	3.36878	23.374	-8.23849	59.6548	0.403
RUG_M_A_2	1.82	107.5	8.70865	852.391	7.944	1855.79	17.2953	-97.8774	1.3	3.35	8.48527				22.8282	6.41975	36.6379	-3.55594	25.6401	0.42
RUG_M_A_3	1.89	120.2	8.17701	849.03	7.05174	1735.63	14.4155	-103.83	1.39	3.56	7.97559				32.6874	2.48253	20.2868	-13.167	87.2791	0.398
RUG_M_A_4	1.81	86.7	8.72226	732.306	8.47576	1596.84	18.4819	-83.957	1.26	3.31	8.48371				30.2767	2.98022	22.5579	-10.1592	69.5286	0.456
RUG_M_A_5	1.895	108.6	8.2687	941.144	9.26323	1945.51	19.1487	-113.819	1.22	3.31	8.09015				26.3211	3.79129	24.9477	-6.94253	48.2781	0.388
RUG_M_A_6	1.87	99.9	8.44516	780.02	7.81583	1646.85	16.5015	-92.3616	1.34	3.41	8.22243				28.5392	3.3506	23.9059	-8.51763	59.547	0.437
RUG_M_A_7	1.83	97.2	8.4124	885.109	9.11544	1861.47	19.1706	-105.214	1.24	3.29	8.21965				26.3252	3.61694	23.8042	-7.27831	49.2428	0.42
RUG_M_A_8	1.87	102.2	9.39272	803.941	7.91281	1887.8	18.5807	-85.5901	1.3	3.26	9.10181				28.0414	4.21938	29.5794	-6.64586	48.3095	0.513
RUG_M_A_9	1.83	105.4	8.50364	852.552	8.08873	1812.45	17.1959	-100.256	1.3	3.39	8.29419				37.8082	2.9033	27.4421	-13.0225	86.9203	0.533
RUG_M_A_10	1.85	103	8.12625	1097.82	10.7	2230.28	21.7376	-135.095	1.15	3.22	7.97806				27.4497	3.90264	26.7816	-7.03362	52.3348	0.45
RUG_M_A_11	1.92	99.9	8.12906	808.693	8.11126	1643.48	16.4843	-99.4807	1.3	3.46	7.93479				50.0845	1.71954	21.5306	-29.1266	198.888	0.354
RUG_M_A_12	1.93	107	8.74383	941.706	8.80099	2058.53	19.2386	-107.698	1.24	3.26	8.52399				24.9074	5.13005	31.9441	-4.8552	36.0953	0.477
RUG_M_A_13	1.73	86.1	8.70231	844.236	9.96737	1836.7	21.6848	-97.012	1.19	3.18	8.49872				32.6584	2.82119	23.0339	-11.5761	76.1057	0.459
RUG_M_A_14	1.9	95.3	8.7	941.988	9.96813	2048.82	21.6806	-108.273			8.49872				29.175	2.48022	18.0901	-11.7631	85.4342	0.484
RUG_M_A_15	1.72	81.9	8.46461	795.456	9.70068	1683.31	20.5282	-93.9735	1.17	3.24	8.27235				28.9265	2.73925	19.8092	-10.56	76.7645	0.357
RUG_M_A_16	1.91	107.4	8.62475	1056.97	9.93393	2279.02	21.4194	-122.55	1.17	3.18	8.43842				44.3232	2.11878	23.4778	-20.9192	148.866	0.481
RUG_M_A_17	1.89	105.6	8.57296	870.92	8.29448	1866.59	17.777	-101.588	1.28	3.35	8.35634				28.7369	4.05869	29.1585	-7.08033	42.7942	0.411
RUG_M_A_18	1.83	109.2	8.69919	816.253	7.4817	1775.18	16.2711	-93.8295	1.34	3.43	8.46888				23.0164	3.04285	17.5089	-7.56409	51.9132	0.395
RUG_M_A_19	1.82	101.5	8.96204	954.544	9.45093	2138.67	21.175	-106.509	1.22	3.14	8.747				27.6475	4.58658	31.7019	-6.02791	40.6408	0.493
RUG_M_A_20	1.75	98.3	8.89371	899.864	9.15426	2000.78	20.3538	-101.179	1.22	3.22	8.67838				46.3629	1.6301	18.894	-28.4418	178.633	0.401
RUG_M_A_21	1.755	93	8.99565	988.156	10.7292	2222.27	24.1289	-109.847	1.09	3.05	8.79576				27.612	3.55772	24.5589	-7.76115	52.5413	0.415
RUG_F_A_1	1.71	70	7.9923	499.554	7.13648	998.146	14.2592	-62.5044	1.46441	3.64175	7.72027	0.289158	0.461056	-0.0788115	32.5505	3.10129	25.2371	-10.4958	72.0474	0.344
RUG_F_A_2	1.73	59	8.45098	435.255	7.5044	913.754	15.7544	-51.5035	1.38739	3.46739	8.11108	0.301681	0.489192	-0.0814533	33.916	3.29003	27.8962	-10.3087	70.7572	0.38
RUG_F_A_3	1.65	66	7.91474	448.974	6.80264	884.12	13.3958	-56.7263	1.45302	3.68029	7.51056	0.279359	0.459792	-0.0776274	33.7056	2.96658	24.9975	-11.3618	69.0292	0.3
RUG_F_A_4	1.7	69	7.97427	543.641	7.87885	1083.78	15.707	-68.1743	1.47441	3.68175	7.70218	0.27099	0.438204	-0.0741028	32.5431	2.88825	23.4982	-11.2674	78.2301	0.327
RUG_F_A_5	1.66	78	7.97865	516.499	6.62179	1025.2	13.1436	-64.7352	1.48188	3.67921	7.47076	0.273828	0.443872	-0.0761749	30.6757	3.41676	26.2029	-8.97801	60.8066	0.34
RUG_F_A_6	1.65	73	7.43102	497.702	6.81784	920.06	12.6036	-66.9763	1.4757	3.7797	7.16766	0.26055	0.444631	-0.0850921	31.4739	3.16011	24.8653	-9.95974	69.2555	0.34
RUG_F_A_7	1.65	65	8.01249	441.078	6.78581	877.903	13.5062	-55.0487	1.44784	3.63584	7.65872	0.276176	0.444665	-0.0791493	32.3434	2.89987	23.4479	-11.1534	73.3557	0.306
RUG_F_A_8	1.63	62	8.04524	417.921	6.74065	835.094	13.4693	-51.9463	1.4501	3.6281	7.67261	0.27625	0.442882	-0.0782877	31.6176	3.00787	23.7754	-10.5116	71.1164	0.319
RUG_F_A_9	1.71	65	7.85286	486.556	7.48548	955.214	14.6956	-61.9591	1.46588	3.67588	7.54416	0.264012	0.426157	-0.0777486	36.9309	2.82607	26.0923	-13.0679	92.1034	0.37
RUG_F_A_10	1.68	66	7.74167	480.565	7.28129	924.7	14.0106	-62.0752	1.42677	3.64544	7.49165	0.283186	0.482231	-0.0856263	28.7383	3.88217	27.8918	-7.40265	50.8105	0.349
RUG_F_A_11	1.78	74	7.97287	575.801	7.78109	1147.7	15.5094	-72.22	1.48441	3.69175	7.68217	0.270938	0.438197	-0.0741525	33.0881	2.96611	24.5357	-11.1554	71.2328	0.311
RUG_F_A_12	1.72	59	7.7279	393.508	6.66962	757.357	12.8366	-50.9204	1.46675	3.68808	7.40903	0.24529	0.38336	-0.0818228	36.3307	2.58246	23.4557	-14.0682	96.4191	0.327
RUG_F_A_13	1.62	70	7.56246	489.884	6.99834	926.182	13.2312	-64.7784	1.48592	3.69859	7.112	0.263876	0.444794	-0.0801732	33.1433	3.0356	25.1524	-10.9182	68.6075	0.312
RUG_F_A_14	1.58	69	7.29435	498.082	7.21857	905.209	13.119	-68.2832	1.45341	3.70741	7.00118	0.241135	0.404073	-0.093568	35.4726	2.66596	23.6421	-13.3058	87.5255	0.316
RUG_F_A_15	1.68	66	7.75396	466.276	7.06479	898.339	13.6112	-60.1339	1.44791	3.66769	7.49164	0.282642	0.478823	-0.0831106	30.4275	3.18266	24.2102	-9.5604	65.5797	0.324
SOC_M_1A_1	1.79	90	8.61872	584.918	6.49909	1253.26	13.9251	-67.866	1.46058	3.57258	8.10008	0.286915	0.441664	-0.0693391	34.7	3.02	26.23	-11	77.7	0.355
SOC_M_1A_2	1.84	79.5	9.112	608.545	7.65465	1377.84	17.3313	-66.7849	1.34894	3.38463	8.31888	0.325062	0.49704	-0.0749115	30.38	2.99	22.73	-10	73.8	0.33
SOC_M_1A_3	1.69	54.5	8.84801	394.798	7.24401	868.646	15.9385	-44.62	1.39275	3.44075	8.15004	0.292038	0.434776	-0.0756237	42.87	2.58	27.66	-17	105.9	0.358
SOC_M_1A_4	1.72	56.4	9.24719	469.333	8.32151	1077.47	19.1041	-50.7541	1.3025	3.24384	8.60342	0.340136	0.521452	-0.0796387	38.76	2.76	26.73	-14	91.1	0.351
SOC_M_1A_5	1.81	78.5	8.49422	637.776	8.12453	1346.1	17.1478	-75.0835	1.34764	3.39564	7.97933	0.322153	0.52694	-0.084845	32.76	3	24.54	-11	81.6	0.37
SOC_M_1A_6	1.84	89.8	8.81827	627.413	6.98678	1375.21	15.3142	-71.1492	1.41421	3.48355	8.16186	0.301356	0.463278	-0.0721948	35.19	2.82	24.8	-12	81	0.324
SOC_M_1A_7	1.78	73.5	8.62573	533.471	7.25811	1144.6	15.5728	-61.8464	1.40214	3.47147	8.06114	0.329243	0.501231	-0.0664206	26.4	5.15	34	-5	34.9	0.367
SOC_M_1A_8	1.72	74.9	9.64308	439.328	5.86553	1051.86	14.0436	-45.5589	1.49613	3.56546	8.40971	0.28951	0.441252	-0.0777083	39.12	3.31	32.39	-12	76	0.417
SOC_M_1A_9	1.77	73.2	9.97816	603.575	8.24556	1495.51	20.4305	-60.4896	1.28141	3.15874	9.21979	0.304554	0.446096	-0.0549904	43.37	2.85	30.95	-15	104	0.433
SOC_M_1A_10	1.748	79.1	10.0497	631.059	7.97798	1575.02	19.9118	-62.7935	1.31432	3.22663	8.91656	0.353105	0.514728	-0.0730357	48.72	2.58	31.48	-19	137.7	0.457
SOC_M_1A_11	1.815	82.9	9.73927	566.469	6.83315	1370.43	16.5311	-58.1633	1.40487	3.36754	8.91045	0.367767	0.549112	-0.0676301	37.31	3.2	29.83	-12	81.1	0.417
SOC_M_1A_12	1.785	80.7	8.82639	614.798	7.61832	1348.96	16.7157	-69.6545	1.36207	3.38874	8.28625	0.311283	0.464345	-0.0609875	32.92	3.88	31.96	-8	56.3	0.401
SOC_M_1A_13	1.856	90.9	8.80236	707.406	7.78224	1548.91	17.0397	-80.3654	1.34093	3.3676	8.17396	0.315742	0.454208	-0.0636987	35.96	3.01	27.05	-12	86.4	0.398
SOC_M_1A_14	1.795	79.5	8.11844	552.328	6.94752	1115.12	14.0266	-68.0337	1.43165	3.60765	7.64609	0.31099	0.481008	-0.0782219	33.87	3.26	27.62	-10	70.3	0.368
SOC_M_1A_15	1.82	86	10.0822	580.402	6.74886	1452.55	16.8901	-57.5671	1.39194	3.33327	8.77618	0.310661	0.478664	-0.0801315	30.86	3.87	29.87	-8	56.8	0.403
SOC_M_1A_16	1.798	73.8	9.19161	631.612	8.55843	1441.42	19.5315	-68.7162	1.28309	3.22442	8.59097	0.279766	0.446819	-0.0789673	45.49	2.99	34	-15	99.2	0.45
SOC_M_1A_17	1.86	82.6	9.81348	583.769	7.06742	1421.7	17.2119	-59.4864	1.37249	3.33516	9.17786	0.343201	0.506021	-0.0586315	27.83	4.17	29.02	-7	45.1	0.344
SOC_M_1A_18	1.743	78.3	9.58447	618.811	7.90307	1472.99	18.8121	-64.5639	1.3217	3.2417	8.97274	0.342657	0.5131	-0.0730477	39.92	2.66	26.55	-15	92.6	0.333
SOC_M_1A_19	1.864	81.1	9.57848	584.264	7.20425	1390.15	17.1412	-60.9976	1.37297	3.33563	8.83958	0.320683	0.468062	-0.0680242	35.57	3.16	28.07	-11	71.8	0.357
SOC_M_1A_20	1.804	75.5	10.2504	516.016	6.83465	1312.18	17.3799	-50.341	1.39715	3.31715	9.42971	0.349797	0.515174	-0.0579701	39.51	3.31	32.67	-12	79.2	0.437
SOC_M_1A_21	1.82	81.6	8.8061	551.075	6.75338	1206.92	14.7907	-62.5788	1.43976	3.5091	8.2352	0.284391	0.424295	-0.0711102	39.32	2.96	29.05	-13	90	0.399
SOC_M_2A_1	1.8	77	9.93004	554.071	7.19573	1365.77	17.7373	-55.7975	1.36884	3.28884	9.25771	0.333645	0.484648	-0.0647175	40.38	2.76	27.84	-15	103.2	0.4
SOC_M_2A_2	1.74	71.2	8.73874	504.732	7.08893	1095.18	15.3817	-57.7579	1.39973	3.46906	8.31921	0.31413	0.495941	-0.0725988	39.32	3	29.51	-13	76.2	0.344
SOC_M_2A_3	1.74	72.3	9.71953	495.367	6.85155	1195.19	16.531	-50.9662	1.40767	3.37033	9.06469	0.322022	0.470443	-0.0633924	33.66	3.3	27.73	-10	68.2	0.364
SOC_M_2A_4	1.86	68.8	9.41432	455.655	6.6229	1065.87	15.4923	-48.4003	1.43326	3.43859	8.72041	0.294204	0.419738	-0.0649692	36.22	2.63	23.79	-14	97	0.341
SOC_M_2A_5	1.79	72.5	10.0604	494.092	6.81506	1235.1	17.0358	-49.1124	1.39007	3.3314	9.28363	0.311448	0.429677	-0.0621117	35.03	4.07	35.61	-9	63.4	0.505
SOC_M_2A_6	1.81	74.1	9.42363	528.227	7.12857	1235.51	16.6735	-56.0535	1.39477	3.37877	8.79008	0.327051	0.493345	-0.0674241	35.28	3	26.44	-12	73.9	0.331
SOC_M_2A_7	1.75	72.3	9.75202	521.894	7.21845	1263.08	17.47	-53.5165	1.36229	3.30363	9.15623	0.336687	0.497218	-0.0656944	38.06	2.63	25.06	-14	96.5	0.341
SOC_M_2A_8	1.66	63	8.58181	456.479	7.2457	973.166	15.4471	-53.1914	1.39535	3.48601	8.15187	0.302247	0.474936	-0.0766277	35.01	3.17	27.77	-11	66.8	0.33
SOC_M_2A_9	1.74	64	9.07686	498.746	7.7929	1124.58	17.5716	-54.9469	1.35196	3.33596	8.63264	0.319108	0.486478	-0.0774056	36.8	2.87	26.39	-13	80.6	0.334
SOC_M_2A_10	1.74	72	8.78097	576.449	8.00624	1257.89	17.4707	-65.6476	1.33259	3.35926	8.4292	0.31951	0.502217	-0.0818568	33.61	2.79	23.44	-12	85.7	0.338
SOC_M_2A_11	1.75	71	8.72862	495.615	6.9805	1075.84	15.1526	-56.7805	1.41295	3.48229	8.30218	0.287244	0.431596	-0.0740093	33.25	3.06	25.42	-11	70.5	0.326
SOC_M_2A_12	1.9	88	9.13266	581.543	6.60844	1321.56	15.0178	-63.6772	1.44074	3.48874	8.59468	0.282135	0.40284	-0.0675729	32.07	2.89	23.17	-11	85.2	0.36
SOC_M_2A_13	1.81	92	9.71744	608.076	6.60952	1468.88	15.9661	-62.5758	1.42494	3.40894	9.02372	0.303611	0.430524	-0.0624783	33.62	2.71	22.8	-12	84.9	0.316
SOC_M_2A_14	1.82	76	8.76752	564.439	7.42683	1229.26	16.1745	-64.3784	1.36884	3.41684	8.40261	0.314081	0.492059	-0.0761787	32.71	3.24	26.49	-10	67.4	0.347
SOC_M_2A_15	1.77	73	8.79722	470.073	6.43935	1027.28	14.0723	-53.4342	1.46603	3.57803	8.30344	0.29002	0.440083	-0.0671628	30.5	3.34	25.44	-9	62.7	0.337
SOC_M_2A_16	1.73	66.5	8.90179	439.569	6.61006	972.198	14.6195	-49.3798	1.43677	3.52744	8.3978	0.290554	0.433009	-0.0683889	34.91	2.77	24.15	-13	81.8	0.316
SOC_M_2A_17	1.79	76.8	8.6019	551.345	7.17897	1178.46	15.3445	-64.0957	1.41079	3.48013	8.21402	0.302194	0.4747	-0.0757577	35.66	3.02	26.92	-12	71.6	0.324
SOC_M_2A_18	1.65	63	8.86092	465.15	7.38333	1024.81	16.2667	-52.4945	1.37518	3.42318	8.42866	0.299402	0.450458	-0.0765125	43.52	2.41	26.26	-18	115.1	0.34
SOC_M_2B_1	1.81	77.5	8.81307	500.424	6.45709	1096.56	14.1491	-56.782	1.46282	3.55348	8.19793	0.279985	0.414324	-0.0680977	22.55	4.34	24.49	-5	39.2	0.297
SOC_M_2B_2	1.77	69	9.5452	487.912	7.07118	1156.42	16.7598	-51.1159	1.3919	3.35456	8.8027	0.317211	0.463725	-0.0670596	30.24	3.35	25.3	-9	63.7	0.345
SOC_M_2B_3	1.81	76.6	9.25621	507.585	6.60917	1166.9	15.1941	-54.8372	1.4351	3.46177	8.60405	0.303592	0.448948	-0.0650907	33.29	2.69	22.39	-12	84.7	0.31
SOC_M_2B_4	1.84	76.1	8.39034	403.748	5.30549	842.51	11.0711	-48.1205	1.59766		7.22789	0.24523	0.360537	-0.0596116	27.29	3.21	21.9	-9	59.6	0.291
SOC_M_2B_5	1.875	87.5	9.33404	544.064	6.21788	1261.89	14.4217	-58.2882	1.47099	3.51899	8.44892	0.290866	0.420922	-0.0614178	31.53	3.16	24.87	-10	71.2	0.351
SOC_M_2B_6	1.894	85.5	8.96637	528.935	6.18638	1177.99	13.7776	-58.991	1.48816	3.57883	8.17048	0.292849	0.44222	-0.0630482	31.53	3.35	26.39	-9	67.2	0.369
SOC_M_2B_7	1.86	73.9	9.75467	552.301	7.47363	1337.29	18.0959	-56.6191	1.35217	3.27217	8.97827	0.313297	0.453729	-0.0600652	30.72	3.73	28.67	-8	60.9	0.407
SOC_M_2B_8	1.84	79.6	9.54557	608.717	7.64719	1445.63	18.1612	-63.7695	1.34407	3.28541	8.84866	0.335233	0.491332	-0.0683684	38.17	2.63	25.13	-14	108.3	0.382
SOC_M_2B_9	1.711	62.5	9.96569	412.867	6.60588	1020.53	16.3284	-41.4289	1.40848	3.39248	9.05604	0.31306	0.446816	-0.0735272	25.84	3.96	25.56	-7	46.6	0.32
SOC_M_2B_10	1.75	67.5	9.10654	455.723	6.75146	1031.39	15.2799	-50.0435	1.41656	3.46456	8.42607	0.326717	0.473346	-0.0591849	30.51	3.4	25.91	-9	63.3	0.353
SOC_M_2B_11	1.82	76.5	8.48896	471.819	6.16756	994.705	13.0027	-55.5803	1.49907	3.67507	7.75837	0.293401	0.429161	-0.0683859	29.29	3.76	27.52	-8	51.3	0.331
SOC_M_2B_12	1.72	75.5	8.75593	559.192	7.40652	1217.02	16.1194	-63.8644	1.37968	3.42768	8.34809	0.306498	0.47436	-0.0768522	29.22	3.77	27.53	-8	47.8	0.304
SOC_M_2B_13	1.69	60	8.54376	425.252	7.08754	902.961	15.0493	-49.7734	1.40434	3.51634	8.01984	0.290408	0.446845	-0.0762918	31.51	3.38	26.64	-9	58.5	0.318
SOC_M_2B_14	1.76	71.8	8.96129	522.041	7.27077	1162	16.1838	-58.2551	1.37763	3.4043	8.51979	0.313464	0.479683	-0.0732684	28.89	3.69	26.64	-8	55.9	0.356
SOC_M_2B_15	1.75	66.5	8.8982	509.008	7.65425	1125.51	16.925	-57.2035	1.36247	3.36781	8.30432	0.311231	0.476231	-0.0780445	38.89	3.06	29.73	-13	82.2	0.388
SOC_M_2B_16	1.79	75	9.26718	471.743	6.28991	1086.78	14.4904	-50.9047	1.46778	3.51578	8.51857	0.282861	0.403626	-0.0631333	28.61	3.87	27.68	-7	51.4	0.352
SOC_M_2B_17	1.85	83	8.6896	566.275	6.82259	1222.89	14.7337	-65.167	1.42001	3.53201	8.03166	0.294983	0.454028	-0.0718313	30.71	3.58	27.5	-9	58	0.353
SOC_M_3B_1	1.84	86.7	8.05895	582.237	6.71553	1167.05	13.4607	-72.2472	1.45457	3.63057	7.56812	0.271717	0.431318	-0.0777064	34.26	2.6	22.27	-13	85.3	0.292
SOC_M_3B_2	1.9	95	8.42589	600.084	6.31667	1256.58	13.2272	-71.2191	1.46988	3.64588	7.93608	0.274171	0.418715	-0.0704438	31.4	2.49	19.52	-13	85.6	0.266
SOC_M_3B_3	1.82	77.9	8.13956	473.023	6.07219	957.378	12.2898	-58.1141	1.51988	3.72788	7.73908	0.253585	0.385278	-0.0712258	31.42	3.12	24.53	-10	67.1	0.318
SOC_M_3B_4	1.67	66.7	8.62798	467.957	7.01585	1002.39	15.0283	-54.2372	1.40656	3.48656	8.16331	0.298923	0.464225	-0.0749651	40.43	2.51	25.36	-16	97.9	0.316
SOC_M_3B_5	1.78	66	8.5872	486.378	7.36937	1037.03	15.7126	-56.6399	1.38547	3.46547	8.15017	0.301478	0.472363	-0.0789217	40.02	2.54	25.45	-16	102	0.339
SOC_M_3B_6	1.8	75.2	8.89025	429.657	5.71353	947.29	12.5969	-48.329	1.5264	3.6704	8.31036	0.273219	0.402759	-0.0606265	35.82	2.7	24.2	-13	87.2	0.319
SOC_M_3B_7	1.85	83	8.08363	516.286	6.22031	1036.53	12.4884	-63.8681	1.5148	3.7228	7.67363	0.267413	0.424039	-0.0723746	34.89	2.48	21.65	-14	96	0.301
SOC_M_3B_8	1.725	69.6	8.22147	507.445	7.29088	1036.64	14.8942	-61.7219	1.38961	3.53361	7.86478	0.289353	0.462955	-0.0821987	33.83	3.08	26.03	-11	72.3	0.34
SOC_M_3B_9	1.85	87	8.0225	563.593	6.47807	1123.17	12.91	-70.2515	1.4827	3.6907	7.63846	0.274332	0.442131	-0.0754241	35.57	3.08	27.41	-12	71.2	0.332
SOC_M_3B_10	1.8	72.4	9.23869	456.885	6.31056	1046.02	14.4477	-49.4534	1.46693	3.51493	8.55191	0.302563	0.453169	-0.0629329	30.46	3.93	29.91	-8	50.1	0.351
SOC_M_3B_11	1.88	80	9.06514	525.222	6.56528	1181.43	14.7679	-57.9387	1.44305	3.49105	8.48843	0.296774	0.443205	-0.0672433	31.49	3.39	26.72	-9	59.2	0.323
SOC_M_3B_12	1.77	64	8.60478	461.162	7.20566	984.592	15.3842	-53.5937	1.39658	3.47658	8.1827	0.302211	0.473664	-0.0771108	37.86	2.72	25.73	-14	86	0.322
SOC_M_3B_13	1.79	75.8	8.8173	467.625	6.1692	1022.77	13.4929	-53.035	1.48267	3.59467	8.27931	0.285199	0.431018	-0.0653521	32.67	2.76	22.58	-12	78.7	0.301
SOC_M_3B_14	1.84	77.9	9.0111	507.801	6.51862	1136.66	14.5913	-56.3528	1.43392	3.51392	8.47709	0.286771	0.418598	-0.0679105	38.04	3.21	30.53	-12	72.7	0.371
SOC_M_3B_15	1.79	77.3	9.34962	523.788	6.77604	1215.83	15.7287	-56.0224	1.40362	3.41962	8.654	0.30581	0.447929	-0.0668123	39.67	2.5	24.78	-16	107.5	0.342
SOC_M_3B_16	1.65	57.9	9.35468	425.316	7.34569	985.474	17.0203	-45.4656	1.35939	3.34339	8.78537	0.334103	0.50863	-0.07066	41.6	2.74	28.5	-15	99.7	0.38
SOC_M_3B_17	1.83	70.8	9.40478	539.228	7.61622	1257.29	17.7584	-57.3355	1.34819	3.30019	8.89391	0.33386	0.503131	-0.0733036	38.56	2.68	25.82	-14	93.4	0.339
SOC_F_A_1	1.75	65.5	8.00105	415.836	6.34864	826.56	12.6192	-51.9727	1.50339	3.72206	7.61354	0.272164	0.439819	-0.0731493	30.38	3.25	24.72	-9	62.3	0.322
SOC_F_A_2	1.72	60.4	7.66728	389.86	6.45464	742.532	12.2936	-50.8473	1.50765	3.79032	7.28384	0.268446	0.451198	-0.0774014	33.18	2.94	24.4	-11	80.4	0.35
SOC_F_A_3	1.69	64.3	8.16295	410.739	6.38785	832.9	12.9533	-50.3175	1.48085	3.67818	7.70748	0.2782	0.443732	-0.0719473	30.75	3.18	24.45	-10	64.6	0.32
SOC_F_A_4	1.67	60	9.19985	379.913	6.33189	867.222	14.4537	-41.2956	1.4549	3.52423	8.42173	0.307816	0.464482	-0.0620029	34.66	2.88	24.99	-12	82.5	0.35
SOC_F_A_5	1.66	56.8	8.54264	341.087	6.00505	723.189	12.7322	-39.9276	1.5216	3.6976	7.96106	0.284118	0.443053	-0.0642074	33.21	3.01	25	-11	72.6	0.331
SOC_F_A_6	1.6	54.4	8.20824	387.822	7.12908	790.677	14.5345	-47.2479	1.41948	3.57415	7.82247	0.291498	0.471577	-0.0790762	34.15	2.94	25.09	-12	79.8	0.351
SOC_F_A_7	1.69	63.4	8.81949	424.305	6.69251	929.121	14.6549	-48.1099	1.44418	3.53485	8.08268	0.299937	0.461883	-0.0689218	27.34	3.74	25.56	-7	51.5	0.33
SOC_F_A_8	1.64	58.3	7.64616	370.32	6.35198	703.429	12.0657	-48.4322	1.50738	3.81138	7.32362	0.267075	0.446794	-0.0765122	27.1	3.3	22.34	-8	53.2	0.266
SOC_F_A_9	1.65	54.8	7.89559	349.852	6.38417	686.02	12.5186	-44.3098	1.4925	3.75383	7.47439	0.271503	0.443042	-0.074453	38.36	2.43	23.27	-16	99.3	0.301
SOC_F_A_10	1.7	63	8.10347	411.074	6.52499	827.498	13.1349	-50.7282	1.48036	3.67769	7.7199	0.278249	0.448591	-0.0739493	36.5	2.7	24.62	-14	91.6	0.34
SOC_F_A_11	1.61	58.3	7.61722	379.752	6.51375	719.331	12.3384	-49.8544	1.48952	3.77219	7.29732	0.256304	0.419631	-0.079879	29.22	3.39	24.78	-9	55.9	0.301
SOC_F_A_12	1.63	59.8	8.38713	395.136	6.60762	823.139	13.7649	-47.1122	1.45246	3.60713	7.83721	0.286997	0.451115	-0.0721512	34.06	3.05	25.98	-11	70.1	0.325
SOC_F_A_13	1.69	62.1	7.79794	377.841	6.0844	732.271	11.7918	-48.454	1.53026	3.81292	7.38515	0.257126	0.413434	-0.0727908	35.39	2.9	25.62	-12	76.8	0.325
SOC_F_A_14	1.61	58.7	8.42382	410.641	6.99558	859.057	14.6347	-48.7475	1.42289	3.55622	7.94286	0.298346	0.475129	-0.0752971	37.45	2.7	25.32	-14	92.5	0.35
SOC_F_B_1	1.81	70	7.58064	455.289	6.50413	858.178	12.2597	-60.0595	1.48196	3.78596	7.17503	0.255574	0.417853	-0.0806834	31.09	2.63	20.46	-12	80.4	0.28
SOC_F_B_2	1.65	60	7.70769	354.195	5.90325	678.39	11.3065	-45.9535	1.54588	3.84988	7.26589	0.246438	0.39022	-0.0727756	30.04	2.94	22.07	-10	63.1	0.265
SOC_F_B_3	1.63	54	7.25425	336.821	6.23743	607.775	11.2551	-46.4309	1.53335	3.86224	6.83172	0.238175	0.396326	-0.0814236	30.67	2.67	20.49	-11	75.1	0.266
SOC_F_B_4	1.52	48.8	7.65843	292.271	5.98916	556.641	11.4066	-38.1633	1.54322	3.87198	7.09311	0.244087	0.388119	-0.073983	30.57	3.09	23.58	-10	62.3	0.285
SOC_F_B_5	1.54	54	7.85322	437.389	8.0998	853.373	15.8032	-55.6955	1.36714	3.51114	7.53296	0.299106	0.513701	-0.0932111	32.58	3.07	25	-11	68.8	0.319
SOC_F_B_6	1.65	51	7.5907	313.878	6.15448	592.111	11.61	-41.3504	1.53657	3.86914	7.02826	0.248473	0.403316	-0.0761846	31.36	2.64	20.73	-12	77.7	0.268
SOC_F_B_7	1.48	40	7.08959	254.242	6.35605	448.877	11.2219	-35.8613	1.51607	3.85357	6.70173	0.224782	0.368449	-0.0856777	30.42	3.19	24.23	-10	57	0.273
SOC_F_B_8	1.71	62	8.23518	424.516	6.84704	868.919	14.0148	-51.5491	1.43513	3.61113	7.69428	0.277475	0.434712	-0.0772552	31.72	3.09	24.54	-10	67.5	0.316
SOC_F_B_9	1.6	54	7.38587	360.686	6.67936	662.372	12.2661	-48.8346	1.49569	3.76969	6.9896	0.252432	0.425896	-0.0847134	33.73	2.87	24.16	-12	72.8	0.295
SOC_F_B_10	1.7	60	8.02568	365.413	6.09021	728.98	12.1497	-45.5304	1.52087	3.77801	7.37812	0.256832	0.40014	-0.0712915	31.44	2.99	23.54	-10	64.9	0.285
SOC_F_B_11	1.55	48	7.64188	296.65	6.18022	563.277	11.7349	-38.819	1.51184	3.8442	7.14308	0.252952	0.40905	-0.0760772	31.21	3.09	24.07	-10	60.4	0.273
SOC_F_B_12	1.61	53.5	7.9318	399.636	7.46984	788.461	14.7376	-50.3841	1.38372	3.55972	7.53108	0.275659	0.443889	-0.0875763	35.83	2.91	26.11	-12	78.5	0.335
SOC_F_B_13	1.61	60	7.91776	360.651	6.01086	709.206	11.8201	-45.5497	1.51885	3.79085	7.31409	0.263467	0.420891	-0.0708468	30.87	2.88	22.24	-11	71.4	0.294
SOC_F_B_14	1.71	60	6.92849	391.194	6.51991	673.679	11.228	-56.4617	1.52863	3.85287	6.61752	0.245823	0.442522	-0.0879276	28.46	2.93	20.83	-10	64.5	0.27
SOC_F_B_15	1.53	44	8.28145	253.265	5.75602	519.972	11.8176	-30.5822	1.45245	3.76245	7.50699	0.26903	0.421615	-0.0645394	33.61	2.84	23.88	-12	74.4	0.301
SOC_F_B_16	1.64	58	7.75062	344.092	5.93262	662.87	11.4288	-44.3954	1.53309	3.8454	7.16266	0.252017	0.401165	-0.0720389	32.03	2.63	21.07	-12	78.7	0.273
SOC_F_B_17	1.71	54	7.30507	394.204	7.30007	715.833	13.2562	-53.963	1.43498	3.72898	7.01228	0.261347	0.453793	-0.093029	32.92	2.82	23.24	-12	76.6	0.305
SOC_F_B_18	1.6	60	7.47025	373.652	6.22754	693.481	11.558	-50.0188	1.51783	3.83077	7.04665	0.256501	0.431101	-0.0779615	34.46	2.52	21.68	-14	88.6	0.285
SOC_F_B_19	1.62	56	7.52723	354.848	6.33658	663.348	11.8455	-47.1419	1.51679	3.82929	7.156	0.257442	0.43053	-0.07897	28.89	3.06	22.11	-9	60.2	0.271
SOC_F_B_20	1.65	63	6.95141	406.368	6.45029	703.66	11.1692	-58.4584	1.53788	3.86917	6.67159	0.223921	0.381249	-0.0883554	33.36	2.71	22.57	-12	74.9	0.274
SPR_M_A_1	1.78	70	9.71662	543.46	7.76372	1309.62	18.7089	-55.931	1.31666	3.23666	9.14947	0.341294	0.50196	-0.0721753	41.0566	3.46755	35.5914	-11.8402	74.4336	0.45
SPR_M_A_2	1.86	65	10.5526	468.096	7.20148	1223.43	18.8219	-44.3585	1.35765	3.21365	9.61677	0.342898	0.480607	-0.0615332	41.5254	3.19638	33.1828	-12.9914	86.0973	0.434
SPR_M_A_3	1.75	65	10.4501	465.509	7.16168	1203.74	18.5191	-44.5461	1.35127	3.23927	9.90479	0.366737	0.538184	-0.0595692	40.7051	3.05539	31.0925	-13.3224	78.7397	0.372
SPR_M_A_4	1.78	73	10.7649	612.333	8.38812	1632.32	22.3606	-56.8824	1.25675	3.04875	10.2548	0.381561	0.542722	-0.0689422	44.0476	3.34501	36.8349	-13.1681	72.0816	0.389
SPR_M_A_5	1.84	79	10.7541	662.862	8.39066	1765.61	22.3495	-61.6378	1.25675	3.04875	10.2548	0.381346	0.542689	-0.0690657	39.8054	3.03096	30.1621	-13.133	82.0663	0.376
SPR_M_A_6	1.84	87	9.23785	878.17	10.0939	2015.48	23.1664	-95.0622	1.21301	3.06901	8.93436	0.369159	0.588158	-0.0950277	42.6233	2.59292	27.6298	-16.4383	115.876	0.396
SPR_M_A_7	1.77	67	10.0517	581.242	8.67525	1448.1	21.6134	-57.8254	1.25042	3.07442	9.54579	0.370878	0.545855	-0.0764172	39.9814	2.81464	28.1333	-14.2048	97.4873	0.372
SPR_M_A_8	1.7	66.9	10.5566	525.523	7.85535	1377.64	20.5925	-49.7813	1.3042	3.13887	9.98031	0.349474	0.484863	-0.066446	46.0774	2.94009	33.868	-15.6721	106.834	0.468
SPR_M_A_9	1.79	60	10.6417	496.168	8.26947	1308.82	21.8136	-46.6251	1.2725	3.08583	9.997	0.373841	0.532513	-0.0673453	40.8988	2.88491	29.4973	-14.1768	95.8404	0.399
SPR_M_A_10	1.75	74	10.073	586.211	7.92177	1465.85	19.8088	-58.196	1.30269	3.18002	9.29186	0.352576	0.512195	-0.0693939	36.8909	3.29106	30.3525	-11.2094	75.7089	0.41
SPR_M_A_11	1.75	62	10.1906	427.719	6.89869	1080.98	17.4351	-41.9721	1.39473	3.31473	9.47157	0.332777	0.474869	-0.0604299	37.8253	3.07812	29.1076	-12.2884	81.9104	0.396
SPR_M_A_12	1.79	82.1	10.7304	787.412	9.59089	2097.4	25.5468	-73.3815	1.18916	2.91716	10.3064	0.403043	0.57901	-0.075893	45.8107	3.45161	39.5302	-13.2723	84.0577	0.508
SPR_M_A_13	1.835	68.7	10.4406	518.238	7.54349	1343.35	19.5539	-49.6367	1.33625	3.19225	9.88154	0.339493	0.47102	-0.0649047	35.9938	3.27332	29.4548	-10.9961	71.0707	0.377
SPR_M_A_14	1.76	64.6	10.1895	482.863	7.47466	1221.42	18.9074	-47.3883	1.33039	3.22906	9.67017	0.336411	0.472962	-0.0659097	36.8307	3.06496	28.2211	-12.0167	80.1637	0.38
SPR_M_A_15	1.79	67.3	10.7346	558.024	8.29159	1486.38	22.0859	-51.9839	1.2733	3.0653	10.2034	0.368385	0.515047	-0.067778	42.8657	3.14075	33.6576	-13.6482	94.3873	0.473
SPR_F_A_1	1.63	58	8.45098	435.255	7.5044	913.754	15.7544	-51.5035	1.38739	3.46739	8.11108	0.295513	0.463631	-0.0824785	43.599	2.90288	31.6407	-15.0192	93.6033	0.38
SPR_F_A_2	1.7	62	8.60126	446.566	7.20268	953.557	15.3799	-51.9187	1.38007	3.49207	8.18007	0.301736	0.468671	-0.0769863	38.118	2.94314	28.0466	-12.9515	83.8458	0.371
SPR_F_A_3	1.6	51	8.91734	340.057	6.66778	751.693	14.7391	-38.1343	1.4407	3.5207	8.44001	0.295355	0.445865	-0.069538	38.3979	3.14405	30.1812	-12.2129	70.936	0.345
SPR_F_A_4	1.65	51	9.15893	343.822	6.74161	780.794	15.3097	-37.5395	1.43008	3.47808	8.70601	0.31866	0.488933	-0.0655583	37.4001	2.82688	26.4315	-13.2302	85.7566	0.345
SPR_F_A_5	1.73	55	9.07203	393.721	7.15856	887.119	16.1294	-43.3994	1.38448	3.41114	8.67234	0.313909	0.474939	-0.0704126	38.64	2.80702	27.1158	-13.7655	91.8955	0.37
SPR_F_A_6	1.7	58	8.53295	432.058	7.44927	915.793	15.7895	-50.634	1.39363	3.46296	8.21818	0.301163	0.474826	-0.0793174	36.918	2.74474	25.3326	-13.4504	87.2173	0.33
SPR_F_A_7	1.62	50	8.54295	337.209	6.74418	715.502	14.31	-39.4722	1.44701	3.55901	8.17207	0.284232	0.435579	-0.0727695	34.6104	2.89755	25.0713	-11.9447	78.6196	0.316
SPR_F_A_8	1.71	57	9.03741	419.96	7.36772	942.95	16.543	-46.4691	1.36622	3.39288	8.6524	0.305695	0.455443	-0.0744901	39.5953	2.69236	26.6512	-14.7066	92.3244	0.336
SPR_F_A_9	1.64	51.5	9.01956	374.852	7.27868	839.189	16.2949	-41.5599	1.38058	3.40724	8.62185	0.311915	0.473416	-0.0729641	38.2037	2.74478	26.2152	-13.9186	85.9573	0.323
SPR_F_A_10	1.65	50	9.07915	326.006	6.52012	734.238	14.6848	-35.9071	1.4506	3.51994	8.61191	0.300046	0.450523	-0.0652969	36.5807	2.57477	23.5468	-14.2074	94.7852	0.323
SPR_F_A_11	1.57	58	9.39183	389.218	6.71065	907.703	15.6501	-41.4422	1.42488	3.43021	8.91994	0.305076	0.44597	-0.0651818	39.0899	2.83797	27.734	-13.7739	86.3733	0.353
SPR_F_A_12	1.65	56	9.31451	422.935	7.55242	978.487	17.473	-45.4061	1.35295	3.33695	8.91074	0.317396	0.469131	-0.073508	42.9076	2.6292	28.2032	-16.3196	105.634	0.371
SPR_F_A_13	1.66	56.1	9.63464	396.307	7.06429	947.731	16.8936	-41.1335	1.38801	3.35068	9.13165	0.31752	0.459887	-0.0663978	33.6264	3.38956	28.4947	-9.92057	68.0702	0.382
TAEK_M_B_1	1.74	63	8.31472	398.316	6.32248	822.894	13.0618	-47.9049	1.49621	3.67221	7.75869	0.272038	0.421529	-0.0705342	39.2729	3.11745	30.6079	-12.5978	87.4726	0.431
TAEK_M_B_2	1.73	57	7.81787	225.72	3.96001	438.928	7.7005	-28.8724	1.83503	4.35237	6.90218	0.189825	0.266465	-0.0492534	39.4618	2.58572	25.5093	-15.2614	97.4352	0.334
TAEK_M_B_3	1.76	55	7.76829	431.744	7.84988	833.215	15.1494	-55.5777	1.37737	3.57471	7.47814	0.290642	0.496318	-0.0914749	33.8035	3.14128	26.5465	-10.7611	71.8545	0.352
TAEK_M_B_4	1.67	54	8.93792	243.05	4.50093	539.688	9.99423	-27.1932	1.70221	3.98488	7.54624	0.228229	0.313095	-0.0480762	34.3813	3.64335	31.3158	-9.43671	54.6721	0.34
TAEK_M_B_5	1.73	60	8.14964	549.026	9.15043	1113.02	18.5504	-67.3681	1.29398	3.34198	7.87072	0.30672	0.511939	-0.101275	45.3704	2.85708	32.4067	-15.88	98.8185	0.411
TAEK_M_B_6	1.69	61	7.36721	526.697	8.63438	965.341	15.8253	-71.4921	1.34827	3.58827	7.17258	0.280318	0.505862	-0.106427	35.5124	2.90025	25.7487	-12.2446	87.3698	0.372
TAEK_M_B_7	1.77	69	8.34631	511.524	7.4134	1060.86	15.3748	-61.2875	1.38633	3.49833	7.82685	0.299577	0.480267	-0.0806315	34.3573	3.20126	27.4967	-10.7324	69.5151	0.351
TAEK_M_B_8	1.59	53.7	6.7991	369.643	6.88349	626.734	11.671	-54.3665	1.50909	3.94109	6.60878	0.216363	0.373092	-0.0969694	29.9892	3.03024	22.7186	-9.89665	60.1533	0.265
TAEK_M_B_9	1.67	64	7.12715	359.284	6.65341	637.235	11.8006	-50.4106	1.50496	3.89429	6.85871	0.237435	0.403704	-0.0880695	31.909	3.24491	25.8855	-9.83357	68.4163	0.356
TAEK_M_B_10	1.73	66	7.936	598.264	9.97106	1181.6	19.6933	-75.3861	1.26143	3.33076	7.71843	0.305319	0.529654	-0.1128	39.1875	2.56347	25.114	-15.2869	102.081	0.339
TAEK_M_B_11	1.85	61	7.36337	465.532	7.63167	854.218	14.0036	-63.2226	1.42583	3.68716	7.10699	0.244614	0.409435	-0.0978461	36.5326	2.81556	25.7149	-12.9753	85.4013	0.341
TAEK_M_B_12	1.69	60	8.22009	442.181	7.36968	904.595	15.0766	-53.7926	1.40875	3.54208	7.85631	0.27473	0.428296	-0.0834972	33.4911	3.26367	27.326	-10.2618	66.4761	0.346
TAEK_M_B_13	1.77	78	8.47326	298.205	3.82315	629.465	8.07006	-35.1937	1.8305	4.28384	7.37646	0.185646	0.238751	-0.0441775	29.7963	3.35814	25.015	-8.87287	59.2486	0.32
TAEK_M_B_1	1.59	49	6.07182	346.436	7.07012	524.214	10.6983	-57.0563	1.54109	4.18642	5.91988	0.199755	0.391017	-0.111189	31.8871	2.58281	20.5896	-12.3459	79.6687	0.267
TAEK_M_B_2	1.7	58	6.90425	466.871	8.0495	802.655	13.8389	-67.6208	1.41379	3.78179	6.69809	0.246028	0.452601	-0.108618	37.1667	2.26673	21.0617	-16.3966	107.441	0.282
TAEK_M_B_3	1.62	55	6.35503	360.586	6.5561	570.714	10.3766	-56.7402	1.55033	4.13166	6.16278	0.210711	0.390117	-0.0982464	35.0431	2.19479	19.2281	-15.9665	99.6496	0.244
TAEK_M_B_4	1.68	61	6.9419	412.452	6.76151	712.766	11.6847	-59.4149	1.50668	3.91735	6.69077	0.234235	0.40935	-0.0918844	32.3522	2.6197	21.1882	-12.3496	73.7024	0.252
TAEK_M_B_5	1.5	40	6.48708	309.992	7.7498	500.482	12.5121	-47.7861	1.4492	3.9452	6.30225	0.231937	0.446969	-0.111591	33.2512	2.6682	22.1802	-12.462	70.3326	0.248
TAEK_M_B_6	1.67	60	7.08981	416.439	6.94066	734.957	12.2493	-58.7378	1.48893	3.85693	6.82321	0.240653	0.416345	-0.0920849	29.875	3.28214	24.5135	-9.1023	57.2062	0.287
TAEK_M_B_7	1.67	55	6.0666	412.911	7.50748	624.336	11.3516	-68.063	1.50136	4.12536	5.9409	0.203668	0.407681	-0.117665	32.4517	2.13362	17.3099	-15.2097	99.4031	0.23
TAEK_M_B_8	1.7	52	6.77148	317.943	6.11428	536.152	10.3106	-46.9532	1.57174	4.06774	6.49063	0.21273	0.361045	-0.0864799	35.0949	2.48696	21.8199	-14.1116	88.5694	0.278
TAEK_M_B_9	1.59	51	6.48689	314.751	6.17159	507.954	9.95987	-48.5211	1.57848	4.15982	6.23869	0.218973	0.399984	-0.0900146	31.5168	2.93073	23.0918	-10.7539	66.481	0.28
TAEK_M_B_10	1.63	50	7.04353	373.866	7.47732	655.057	13.1011	-53.0794	1.45254	3.79921	6.79287	0.250998	0.451183	-0.0985793	35.355	2.38721	21.0999	-14.8102	89.9049	0.26
TEN_M_AB_1	1.77	61	8.63212	423.65	6.94508	907.269	14.8733	-49.0783	1.406	3.518	8.1287	0.298651	0.461924	-0.0741595	33.0298	2.96185	24.4573	-11.1517	72.3099	0.316
TEN_M_AB_2	1.79	66	8.81119	474.315	7.18659	1036.24	15.7006	-53.8309	1.40418	3.45218	8.25252	0.318557	0.502684	-0.0734686	30.9927	3.66385	28.3881	-8.45903	55.5902	0.353
TEN_M_AB_3	1.86	84	8.74275	557.713	6.63944	1210.61	14.412	-63.7915	1.4545	3.5345	8.01631	0.30279	0.47398	-0.06892	33.0479	3.34486	27.6352	-9.8802	69.6467	0.385
TEN_M_AB_4	1.82	77.3	8.90043	530.335	6.86074	1171.17	15.1509	-59.5854	1.427	3.475	8.32054	0.308061	0.474426	-0.0704379	29.9329	3.68312	27.5616	-8.12705	55.7905	0.352
TEN_M_AB_5	1.755	74.6	8.79266	576.911	7.73339	1259.11	16.8781	-65.6128	1.33572	3.38372	8.27622	0.329507	0.524837	-0.0783064	31.8044	3.68857	29.3281	-8.62241	58.3002	0.379
TEN_M_AB_6	1.74	62	8.10365	575.924	9.28909	1160.95	18.7251	-71.0697	1.28357	3.33157	7.82289	0.307988	0.518646	-0.103564	35.0925	3.43785	30.1607	-10.2077	66.9434	0.388
TEN_M_AB_7	1.77	67.7	8.47946	559.296	8.26139	1177.48	17.3926	-65.959	1.32806	3.37606	8.09476	0.324236	0.530666	-0.0870393	33.7122	3.52066	29.6723	-9.57552	63.788	0.388
TEN_M_AB_8	1.79	68.4	8.4815	539.538	7.88798	1137.51	16.6302	-63.6135	1.35446	3.42379	8.15178	0.311813	0.501285	-0.0828785	33.2429	3.15385	26.2108	-10.5404	72.3728	0.359
TEN_M_AB_9	1.8	75	8.09009	551.657	7.35543	1109.57	14.7943	-68.1893	1.40254	3.54654	7.73094	0.284567	0.458585	-0.0843309	27.4742	3.8175	26.2207	-7.19691	51.3659	0.339
TEN_M_AB_10	1.75	71.1	7.99103	567.333	7.97937	1127.51	15.8581	-70.9963	1.3462	3.4902	7.64067	0.292153	0.483783	-0.0914208	30.838	3.01827	23.2694	-10.2171	70.0068	0.316
TEN_M_AB_11	1.76	65	8.97593	363.234	5.58822	806.707	12.4109	-40.4676	1.53898	3.71498	8.19307	0.293677	0.451725	-0.0572652	30.5502	3.75987	28.7162	-8.12534	52.5642	0.345
TEN_M_AB_12	1.77	67	8.76278	431.876	6.44591	939.448	14.0216	-49.2853	1.47018	3.58218	8.25907	0.297832	0.461523	-0.0667103	27.9962	3.51533	24.604	-7.96403	53.9163	0.308
TEN_M_AB_13	1.73	67	8.7716	472.425	7.05113	1029.21	15.3613	-53.8585	1.41643	3.48576	8.23582	0.303977	0.470596	-0.0729175	32.5746	3.29426	26.8273	-9.88828	64.0798	0.336
TEN_M_AB_14	1.789	70.3	8.21603	544.561	7.74624	1111.97	15.8175	-66.2803	1.37748	3.48948	7.90187	0.300209	0.49227	-0.0853132	29.3115	3.41172	25.0007	-8.5914	58.1754	0.321
TEN_M_AB_15	1.7	68	9.00396	454.653	6.68608	1016.61	14.9501	-50.4948	1.42414	3.49347	8.44937	0.302931	0.45753	-0.0675332	30.9045	3.49658	27.015	-8.83852	57.2696	0.331
TEN_M_AB_16	1.78	70	8.38757	429.323	6.13318	896.338	12.8048	-51.1856	1.5078	3.6838	7.88502	0.25245	0.370937	-0.0692566	29.4006	3.46368	25.4586	-8.48824	57.4856	0.327
TEN_M_AB_17	1.8	73.6	8.94214	534.495	7.26216	1186.79	16.1249	-59.7726	1.38724	3.41391	8.38888	0.318808	0.495648	-0.0726775	29.63	3.92464	29.0718	-7.54973	51.0595	0.36
TEN_F_AB_1	1.61	58	8.01973	424.885	7.32561	846.703	14.5983	-52.98	1.41493	3.5696	7.67636	0.288846	0.477227	-0.0831853	32.5534	3.07357	25.0138	-10.5914	69.7114	0.329
TEN_F_AB_2	1.63	57	7.57432	374.287	6.56644	704.484	12.3594	-49.4153	1.49592	3.77858	7.11199	0.264238	0.444847	-0.080081	31.2676	3.04967	23.839	-10.2528	67.4523	0.31
TEN_F_AB_3	1.65	56	8.29648	394.609	7.04659	813.236	14.5221	-47.5634	1.42151	3.55484	7.78148	0.295168	0.475879	-0.0771053	31.6185	3.29085	26.0129	-9.608	64.1623	0.338
TEN_F_AB_4	1.59	53.3	7.53307	399.961	7.50396	748.976	14.0521	-53.094	1.41746	3.65746	7.2853	0.274798	0.474456	-0.0912396	33.5799	2.88995	24.261	-11.6196	76.4621	0.321
TEN_F_AB_5	1.67	50	7.29067	319.646	6.39292	579.344	11.5869	-43.8432	1.51529	3.88329	6.98675	0.246456	0.415107	-0.0821155	32.0324	2.93797	23.5276	-10.9029	71.713	0.308
TEN_F_AB_6	1.66	59	7.46582	407.457	6.90605	756.186	12.8167	-54.5763	1.46095	3.76495	7.06464	0.265374	0.453126	-0.085372	33.1765	2.97468	24.6724	-11.153	74.4651	0.328
TEN_F_AB_7	1.68	47.7	7.91276	307.04	6.43689	604.232	12.6673	-38.8031	1.48067	3.742	7.55154	0.253654	0.394472	-0.076547	26.3954	3.56142	23.5013	-7.4115	50.7991	0.289
TEN_F_AB_8	1.65	52	7.48357	358.9	6.90192	667.486	12.8363	-47.9584	1.47672	3.75939	7.22272	0.263389	0.448003	-0.0852521	32.5898	2.83359	23.0866	-11.5012	75.6178	0.306
TEN_F_AB_9	1.66	51	7.47438	352.097	6.90387	654.05	12.8245	-47.1072	1.46094	3.76494	7.06462	0.265697	0.453179	-0.0852043	32.8484	3.30169	27.1138	-9.94896	63.4547	0.336
TEN_F_AB_10	1.63	58	7.45518	402.107	6.93288	745.318	12.8503	-53.9366	1.47534	3.75801	7.21094	0.262858	0.449066	-0.0860153	33.9037	2.85053	24.1609	-11.8938	78.2633	0.322
TEN_F_AB_11	1.61	61	7.90443	437.794	7.17695	860.083	14.0997	-55.3859	1.43652	3.61252	7.51581	0.282773	0.470326	-0.0829997	32.6283	2.92116	23.8281	-11.1697	72.4101	0.31
TEN_F_AB_12	1.64	55	8.3586	379.449	6.89908	788.485	14.3361	-45.3963	1.43712	3.57046	7.95448	0.277154	0.428356	-0.0765648	30.6386	3.35729	25.7157	-9.12599	60.9445	0.329
TEN_F_AB_13	1.67	57.3	8.03486	388.637	6.78249	776.687	13.5548	-48.3688	1.45204	3.64937	7.60849	0.266889	0.421202	-0.0787179	29.5682	3.22774	23.8596	-9.16064	59.387	0.297
TEN_F_AB_14	1.61	55.6	7.91745	398.854	7.17363	784.625	14.112	-50.3766	1.43652	3.61252	7.51582	0.283229	0.470393	-0.0827631	30.9858	3.45928	26.7971	-8.95729	55.2862	0.314
SPSC_M_1	1.69	68.2	8.48687	521.781	7.65075	1097.85	16.0975	-61.481	1.37698	3.45698	8.14885	0.325958	0.537439	-0.0807912	29.1297	3.27094	23.8204	-8.9056	61.0635	0.312
SPSC_M_2	1.9	94.7	7.95395	674.535	7.12286	1332.58	14.0716	-84.805	1.42226	3.59826	7.70302	0.290366	0.484693	-0.0826373	27.2538	3.54114	24.1274	-7.69634	53.4795	0.31
SPSC_M_3	1.82	84	8.40875	527.764	6.28291	1100.23	13.098	-62.7637	1.46993	3.64593	8.04743	0.293925	0.468777	-0.0689965	24.7699	3.74853	23.2126	-6.60789	45.8586	0.28
SPSC_M_4	1.86	90.2	7.51563	554.765	6.15039	1035.66	11.4818	-73.8148	1.539	3.843	7.24246	0.25816	0.433948	-0.0770149	23.5257	3.20896	18.8733	-7.33127	53.0054	0.246
SPSC_M_5	1.79	80.6	7.95587	418.732	5.19519	825.874	10.2466	-52.6319	1.63547	3.97147	7.48389	0.254517	0.408934	-0.0616154	29.3067	2.88513	21.1385	-10.1578	64.6716	0.265
SPSC_M_6	1.78	70.6	8.1512	352.727	4.99613	711.726	10.0811	-43.273	1.64326	3.97926	7.64494	0.26675	0.431898	-0.0571032	26.3605	3.49067	23.0039	-7.5517	51.0433	0.28
SPSC_M_7	1.74	80.1	7.61102	529.147	6.60607	999.758	12.4814	-69.5238	1.46727	3.77127	7.36173	0.278802	0.476446	-0.0803374	23.5194	3.11219	18.2993	-7.55719	50.3151	0.219
SPSC_M_8	1.77	77.1	9.60778	363.905	4.71991	864.917	11.2181	-37.8761	1.63008	3.83808	8.70748	0.275946	0.403178	-0.0458884	25.7862	3.75718	24.2208	-6.86318	45.8126	0.28
SPSC_M_9	1.66	65.5	8.17275	462.03	7.05389	936.303	14.2947	-56.533	1.43046	3.57446	7.87539	0.303171	0.50292	-0.0787433	28.1746	3.07089	21.6303	-9.17471	58.4617	0.26
SPSC_M_10	1.76	74.6	7.59916	482.016	6.46134	909.458	12.1911	-63.4301	1.49712	3.80112	7.31479	0.267372	0.450786	-0.079496	27.224	3.32448	22.6264	-8.18894	51.4377	0.265
SPSC_M_11	1.8	74.1	9.04346	475.559	6.41781	1065.13	14.3742	-52.586	1.4669	3.5469	8.49178	0.306949	0.472628	-0.0651641	28.3025	3.15236	22.3049	-8.9782	58.1246	0.272
SPSC_M_12	1.77	95	8.22585	607.015	6.38963	1240.84	13.0614	-73.7936	1.46492	3.67292	7.70652	0.274491	0.409455	-0.0628977	29.6241	2.99984	22.2169	-9.87524	66.6612	0.288
SPSC_M_13	1.78	85	8.40142	579.403	6.8165	1208.5	14.2177	-68.9649	1.42598	3.56998	7.9835	0.303542	0.472184	-0.0708633	30.3163	3.45453	26.1822	-8.77582	60.2565	0.341
SPSC_M_14	1.75	74	8.42285	592.914	8.01235	1240.37	16.7617	-70.3935	1.35018	3.39818	7.98765	0.316353	0.499841	-0.0798609	33.7884	3.46917	29.3044	-9.73963	64.9076	0.372
SPSC_M_15	1.73	85	8.37051	630.82	7.42141	1312.37	15.4396	-75.3622	1.3848	3.4968	8.00166	0.326644	0.496481	-0.0740063	31.8435	3.50922	27.9364	-9.07425	61.4225	0.355
SPSC_M_16	1.77	86	8.15985	651.024	7.57004	1323.46	15.3891	-79.7838	1.3841	3.4961	7.85387	0.332137	0.51484	-0.0797073	33.2399	3.23747	26.9033	-10.2673	62.2663	0.315
SPSC_F_1	1.69	56.4	7.52	356.83	5.76	667.92	10.77	-47.46	1.58	3.93	7.07	0.246802	0.441805	-0.0750987	26.0347	2.75407	17.9253	-9.45317	58.697	0.211
SPSC_F_2	1.64	51.2	7.64	430.34	6.15	819.17	11.7	-56.29	1.52	3.83	7.15	0.273883	0.47297	-0.0769122	24.5368	3.49305	21.4271	-7.02447	46.0662	0.243
SPSC_F_3	1.65	66.5	7.29	394.47	6.07	714.52	10.99	-54.12	1.54	3.93	6.98	0.283411	0.477257	-0.0847807	22.9857	3.22259	18.5183	-7.13267	45.0582	0.2
SPSC_F_4	1.61	62.3	8.17128	430.733	6.15333	874.742	12.4963	-52.7131	1.51633	3.735	7.59897	0.246802	0.441805	-0.0750987	28.5877	3.25477	23.2616	-8.78332	55.1919	0.273
SPSC_F_5	1.63	59	6.86	416.74	6.22	711.48	10.62	-60.72	1.55	4.02	6.64	0.240508	0.383209	-0.057343	26.3184	3.35588	22.0803	-7.84247	47.6526	0.238
SPSC_F_6	1.62	58	7.31	405.67	5.88	738.03	10.7	-55.52	1.58	3.97	6.99	0.21673	0.403279	-0.0747892	23.9455	3.51948	21.0689	-6.80371	39.8826	0.202
SPSC_F_7	1.69	47.5	6.11	524.98	6.25	799.27	9.52	-85.87	1.6	4.26	5.96	0.226424	0.434164	-0.0770657	24.1152	3.26893	19.7077	-7.37707	46.8035	0.217
SPSC_F_8	1.66	59.5	6.11	480.09	6.4	730.68	9.74	-78.59	1.59	4.25	5.98	0.244828	0.429535	-0.0661183	24.5407	2.8006	17.1822	-8.76266	52.5847	0.188
SPSC_F_9	1.63	76	6.59	382.26	5.88	627.39	9.65	-58.03	1.6	4.16	6.37	0.209531	0.405731	-0.0806828	21.1915	3.3457	17.7251	-6.33396	39.8631	0.178
SPSC_F_10	1.64	56.5	6.59	344.1	5.83	564.97	9.58	-52.19	1.61	4.17	6.38	0.208719	0.398502	-0.0992502	29.2078	2.81202	20.5332	-10.3868	64.0373	0.244
SPSC_F_11	1.67	57.7	6.21373	339.543	5.88462	525.85	9.11351	-54.6439	1.61945	4.28612	6.03316	0.21673	0.403279	-0.0747892	25.0435	2.66678	16.6964	-9.3909	58.7429	0.194
SPSC_F_12	1.7	47.3	6.18816	306.112	6.47172	471.395	9.96608	-49.4674	1.57185	4.21718	5.98261	0.208719	0.398502	-0.0992502	26.4628	2.8876	19.1035	-9.16427	55.4073	0.214
SPSC_F_13	1.68	61	7.45842	415.712	6.81495	769.714	12.6183	-55.7373	1.56	3.77962	7.16712	0.226424	0.434164	-0.0770657	31.9219	2.59925	20.7432	-12.2812	28.031	0.243
SPSC_F_14	1.65	51	6.71	302	5.93	507	9.9	-45.0075	1.6	4.09	6.28	0.190782	0.340681	-0.0915304	24.3168	3.43427	20.8776	-7.08062	63.3831	0.172
VOL_M_2B_1	1.8	78	7.80345	503.341	6.71122	975.318	13.0042	-64.5024	1.47082	3.71082	7.31816	0.289195	0.492032	-0.077962	29.5423	3.51683	25.9738	-8.40026	56.8936	0.331
VOL_M_2B_2	1.83	82.4	8.08964	514.157	6.23977	1034.85	12.5589	-63.5575	1.48644	3.72644	7.47233	0.258647	0.398321	-0.0725841	27.8319	3.64492	25.3613	-7.6358	53.1132	0.326
VOL_M_2B_3	1.89	82	8.3768	551.49	6.72548	1148.11	14.0014	-65.8354	1.43713	3.58113	7.71349	0.286871	0.450674	-0.0737349	33.5619	3.42191	28.7114	-9.80793	69.113	0.396
VOL_M_2B_4	1.87	84	7.96673	551.898	6.57022	1093.46	13.0174	-69.2754	1.48509	3.69309	7.4528	0.266162	0.425395	-0.077011	31.2698	3.80135	29.7169	-8.22599	53.9786	0.364
VOL_M_2B_5	1.88	79.7	8.28213	511.574	6.41875	1054.14	13.2264	-61.7684	1.47596	3.65196	7.61062	0.264207	0.401553	-0.0726893	31.2325	3.81986	29.8259	-8.17634	56.8147	0.393
VOL_M_2B_6	1.75	70	7.75943	601.949	8.59927	1162.48	16.6069	-77.5765	1.32026	3.49626	7.45021	0.289643	0.49325	-0.10104	34.9467	3.21595	28.0967	-10.8667	68.1126	0.345
VOL_M_2B_7	1.79	73	8.59491	592.831	8.46902	1265.95	18.085	-68.9747	1.3015	3.3175	8.07508	0.330866	0.536699	-0.0867546	37.9539	3.06651	29.0964	-12.3769	78.7638	0.372
VOL_M_2B_8	1.81	75.1	8.70756	652.188	8.68426	1411.09	18.7895	-74.8991	1.29853	3.28253	8.21529	0.337375	0.546023	-0.0874813	36.0991	3.03513	27.3914	-11.8938	79.3886	0.37
VOL_M_2B_9	1.7	53	8.06341	375.659	7.0879	751.923	14.1872	-46.5881	1.43598	3.61198	7.57679	0.287643	0.469727	-0.08054	30.262	3.34266	25.2889	-9.05326	58.7048	0.308
VOL_M_2B_10	2.02	85	6.93204	618.177	7.27267	1066.49	12.5469	-89.1769	1.46068	3.86068	6.67596	0.246992	0.448019	-0.0979593	29.1921	3.80624	27.778	-7.66954	48.8852	0.322
VOL_M_2B_11	1.75	69	7.26273	560.012	8.00017	1012.07	14.4581	-77.1076	1.38886	3.66086	7.01817	0.268689	0.478682	-0.101609	30.5305	3.65387	27.8886	-8.35568	55.7549	0.35
VOL_M_2B_12	1.76	73	8.29504	564.891	7.73824	1165.47	15.9654	-68.0999	1.35296	3.46496	7.85531	0.29494	0.468516	-0.0856678	28.4543	3.64385	25.9208	-7.80885	53.6152	0.331
VOL_M_2B_13	1.79	74.4	8.3287	543.262	7.30191	1124.64	15.1161	-65.2278	1.38295	3.52695	7.84828	0.293737	0.467056	-0.0804898	29.2295	3.56452	26.0473	-8.20011	57.0544	0.342
VOL_M_2B_14	1.79	67	8.79199	521.884	7.78932	1138.73	16.996	-59.3591	1.36298	3.37898	8.25078	0.324942	0.51764	-0.0790549	37.6152	3.27476	30.7952	-11.4864	81.875	0.442
VOL_M_2B_15	1.76	72	8.34844	462.264	6.42034	957.559	13.2994	-55.3713	1.47126	3.64726	7.73943	0.294445	0.474068	-0.0701162	35.6973	3.06188	27.3253	-11.6586	77.822	0.366
VOL_M_2B_16	1.94	76	8.99563	542.134	7.13335	1211.3	15.9382	-60.2664	1.39142	3.43942	8.21898	0.30934	0.468086	-0.0719265	30.7087	3.34825	25.7051	-9.17155	69.3081	0.382
VOL_M_2B_17	1.75	73	8.13317	446.82	6.12082	903.043	12.3705	-54.938	1.51046	3.71846	7.44866	0.268578	0.421784	-0.0700138	32.6253	3.71464	30.2978	-8.7829	61.003	0.402
VOL_M_2B_18	1.78	76.4	8.58509	416.11	5.44646	886.155	11.5989	-48.4689	1.57181	3.77981	7.69005	0.281092	0.441124	-0.0583456	30.1469	3.973	29.9434	-7.58795	53.4274	0.391
VOL_M_2B_19	1.8	71.3	8.0422	546.603	7.66625	1094.43	15.3497	-67.9669	1.38204	3.52604	7.59044	0.276591	0.44094	-0.0884623	33.9297	2.80611	23.8026	-12.0914	86.092	0.34
VOL_F_2B_1	1.73	62	7.2963	444.086	7.2209	807.338	13.1274	-60.8645	1.4534	3.7574	7.00117	0.241401	0.404154	-0.0929122	27.5535	3.90539	26.9018	-7.05524	46.4173	0.312
VOL_F_2B_2	1.75	66.2	7.02251	425.03	6.42039	742.876	11.2217	-60.5239	1.52325	3.95996	6.61216	0.23485	0.402255	-0.0862953	26.6295	4.01329	26.7179	-6.63533	45.5594	0.32
VOL_F_2B_3	1.76	67	6.8275	425.551	6.35151	722.804	10.7881	-62.329	1.55153	4.01553	6.5404	0.23095	0.407563	-0.0881787	26.5583	3.11272	20.6672	-8.53219	60.2525	0.28
VOL_F_2B_4	1.77	65.3	7.51508	484.189	7.41484	905.238	13.8628	-64.429	1.42819	3.66819	7.2448	0.271479	0.467373	-0.0898692	26.6469	3.78463	25.2121	-7.04081	50.827	0.331
VOL_F_2B_5	1.55	55	6.8959	443.256	8.05919	761.243	13.8408	-64.2781	1.41351	3.70151	6.70461	0.245667	0.452747	-0.108919	30.8375	3.63522	28.0253	-8.48297	55.766	0.346
VOL_F_2B_6	1.69	59.1	6.85971	410.829	6.95143	701.684	11.8728	-59.8902	1.49672	3.90738	6.63968	0.234151	0.416324	-0.0950294	28.5081	3.4776	24.7849	-8.19764	54.7357	0.308
VOL_F_2B_7	1.69	70	7.2674	468.379	6.69112	847.587	12.1084	-64.4493	1.49697	3.83644	6.87902	0.241098	0.403501	-0.0869788	28.6833	3.10052	22.2333	-9.25113	63.2732	0.291
VOL_F_2B_8	1.74	66	7.52954	413.823	6.27005	774.984	11.7422	-54.96	1.51847	3.82041	6.97917	0.24963	0.407672	-0.0781161	30.2288	3.03589	22.9429	-9.95715	69.0707	0.312
VOL_F_2B_9	1.8	62	7.1467	370.639	5.97804	658.717	10.6245	-51.8615	1.56474	4.01207	6.61494	0.235722	0.396069	-0.0788297	28.2371	3.29083	23.2309	-8.58052	60.2981	0.313
VOL_F_2B_10	1.81	64.7	7.06367	452.991	7.00141	796.668	12.3133	-64.1297	1.48578	3.85378	6.79557	0.240746	0.418527	-0.0926773	30.1504	2.99115	22.5461	-10.0799	68.9839	0.304
VOL_F_2B_11	1.7	70	6.57323	447.825	6.39749	732.693	10.467	-68.1285	1.5564	4.0444	6.3634	0.221632	0.402569	-0.0927912	27.6819	3.31646	22.9515	-8.34684	57.9012	0.3
VOL_F_2B_12	1.73	65.2	7.0776	381.827	5.85624	672.32	10.3117	-53.9486	1.59186	4.02386	6.76343	0.234629	0.400643	-0.0774369	26.755	3.50812	23.4649	-7.62659	52.2708	0.294
VOL_F_2B_13	1.64	54	7.30743	357.194	6.61469	648.99	12.0183	-48.8809	1.51054	3.84654	6.96054	0.247035	0.41774	-0.0852954	31.1284	3.03838	23.645	-10.2451	68.3569	0.312
VOL_F_2B_14	1.71	54	7.45608	363.86	6.1881	675.039	11.4803	-48.8005	1.51253	3.85644	6.88896	0.2407	0.387465	-0.0783879	35.0066	2.97536	26.0393	-11.7655	76.2769	0.338
VOL_F_2B_15	1.58	70	6.54881	450.725	6.43893	734.887	10.4984	-68.8255	1.53836	3.92973	6.2986	0.223512	0.409399	-0.0932252	27.7491	3.31883	23.0237	-8.36111	54.9686	0.281
VOL_F_2B_16	1.67	65.2	7.26704	396.288	6.07804	716.841	10.9945	-54.5323	1.54462	3.93395	6.98065	0.251951	0.431994	-0.0764475	28.6079	3.72811	26.6633	-7.67355	52.6882	0.339
WEIGHT_M_AB_1	1.79	85	7.49341	638.823	7.51556	1191.23	14.0144	-85.2512	1.41746	3.65746	7.28531	0.299794	0.470476	-0.0737192	50.5347	2.36055	29.8224	-21.408	138.296	0.382
WEIGHT_M_AB_2	1.8	82	7.71608	676.343	8.24809	1299.56	15.8483	-87.6537	1.36828	3.52295	7.53908	0.286508	0.495011	-0.110115	47.2257	2.5722	30.3685	-18.36	124.002	0.413
WEIGHT_M_AB_3	1.84	100	7.06083	695.634	6.95634	1223.28	12.2328	-98.52	1.49174	3.83841	6.90806	0.250486	0.423218	-0.0824642	41.4698	2.44402	25.3382	-16.9679	119.542	0.361
WEIGHT_M_AB_4	1.73	83.2	6.9013	555.997	6.68265	955.646	11.4861	-80.5641	1.51893	3.9296	6.74803	0.231613	0.422238	-0.0906034	46.8635	2.81238	32.9495	-16.6633	107.086	0.432
WEIGHT_M_AB_5	1.67	75	8.23253	609.727	8.12969	1248.51	16.6468	-74.0631	1.35499	3.42432	7.91788	0.315771	0.519308	-0.0883772	47.5768	3.21306	38.2167	-14.8073	92.51	0.469
WEIGHT_M_AB_6	1.69	75	7.99134	549.968	7.33291	1092.83	14.5711	-68.8205	1.41493	3.5696	7.67637	0.313263	0.532474	-0.0950214	49.4403	2.92798	36.1901	-16.8854	109.535	0.463
WEIGHT_M_AB_7	1.72	75	7.30183	591.703	7.88937	1074.88	14.3318	-81.0349	1.41175	3.67308	7.13701	0.251648	0.430115	-0.0928594	46.9885	2.96106	34.7839	-15.8688	103.244	0.458
WEIGHT_M_AB_8	1.81	90.4	8.49644	700.595	7.74994	1480.26	16.3745	-82.4574	1.37179	3.41979	8.01155	0.319167	0.537618	-0.0942607	48.931	2.6656	32.6077	-18.3565	121.773	0.439
WEIGHT_M_AB_9	1.83	93.8	7.87067	674.007	7.18558	1319.57	14.068	-85.6353	1.43652	3.61252	7.51581	0.276786	0.46905	-0.0926057	48.6247	2.69316	32.7385	-18.0549	114.192	0.421
WEIGHT_F_AB_1	1.66	64	7.45	443.81	6.93	822.05	12.84	-59.58	1.48	3.76	7.21	0.262611	0.449024	-0.0861435	36.7449	2.95203	27.1181	-12.4473	81.8823	0.36
WEIGHT_F_AB_2	1.65	74.8	6.76	500.62	6.69	842.95	11.27	-74.07	1.51	3.97	6.59	0.226022	0.400835	-0.0938895	37.6188	2.78544	26.1962	-13.5055	84.8156	0.338
WEIGHT_F_AB_3	1.66	68	7.2	486.42	7.15	871.22	12.81	-67.57	1.46	3.79	7	0.25804	0.456255	-0.0919582	38.4414	2.87926	27.6707	-13.3511	85.1089	0.358
WEIGHT_F_AB_4	1.64	64	7.46	442.16	6.91	820.07	12.81	-59.29	1.48	3.76	7.22	0.262427	0.447842	-0.0857532	38.2969	2.85995	27.3818	-13.3907	86.7417	0.363
WEIGHT_F_AB_5	1.64	63	7.45	429.26	6.81	794.92	12.62	-57.64	1.48	3.78	7.17	0.261153	0.444732	-0.0847778	39.032	2.65135	25.8719	-14.7215	95.4469	0.344
WEIGHT_F_AB_6	1.67	68	7.45	469.83	6.91	870.82	12.81	-63.03	1.46	3.76	7.06	0.26493	0.453061	-0.0856055	37.8425	2.72848	25.8131	-13.8694	92.6215	0.353
WEIGHT_F_AB_7	1.69	73	7.21	519.98	7.12	932.35	12.77	-72.15	1.47	3.79	7.01	0.257628	0.454582	-0.0915352	38.994	2.62199	25.5604	-14.8719	97.8866	0.346
WEIGHT_F_AB_8	1.7	64.4	6.77	430.69	6.69	726.53	11.28	-63.58	1.51	3.97	6.59	0.226705	0.400998	-0.0935321	37.7376	2.67794	25.2648	-14.092	95.4314	0.355
MEAN	1.7453	70.2839	8.22331	495.794	7.01319	1024.84	14.3988	-60.3569	1.43842	3.61462	7.7638	0.280979	0.449452	-0.0781275	33.1396	3.14639	25.7761	-10.9098	71.7804	0.334703
SD	0.10069	13.9281	0.913472	132.706	0.907546	331.545	2.80082	14.8642	0.0940995	0.254649	0.794155	0.0366532	0.0478118	0.0112423	4.8383	0.528906	4.01676	2.86625	18.8207	0.0553997
CV	0.0576919	0.198169	0.111083	0.267663	0.129406	0.32351	0.194518	-0.246271	0.0654186	0.0704497	0.102289	0.130448	0.106378	-0.143897	0.145998	0.168099	0.155833	-0.262723	0.262198	0.165519
Min	1.48	40	6.0666	211.256	3.82315	363.654	7.4215	-135.095	1.09	2.91716	5.9155	0.174867	0.238751	-0.117665	21.1915	1.6301	16.494	-29.1266	25.5857	0.172
Max	2.07	130	10.7649	1097.82	10.7292	2296.07	25.5468	-27.1932	1.83503	4.43558	10.3064	0.403043	0.598176	-0.0441775	50.5347	6.94053	49.9993	-3.55594	198.888	0.533
